# Supplementary material for: Comparison of three video laryngoscopes and direct laryngoscopy for emergency endotracheal intubation: a retrospective cohort study
Source: PubMed Central journal article supplement — BMJ Open. 2019 Mar 30;9(3):e024927. doi: 10.1136/bmjopen-2018-024927 (PMC6475241; doi:10.1136/bmjopen-2018-024927), 2019-03-30
Supplement: bmjopen-2018-024927.draft_revisions.pdf [file bmjopen-2018-024927.draft_revisions.pdf]

# BMJ Open

BMJ Open is committed to open peer review. As part of this commitment we make the peer review history of every article we publish publicly available.

When an article is published we post the peer reviewers' comments and the authors' responses online. We also post the versions of the paper that were used during peer review. These are the versions that the peer review comments apply to.

The versions of the paper that follow are the versions that were submitted during the peer review process. They are not the versions of record or the final published versions. They should not be cited or distributed as the published version of this manuscript.

BMJ Open is an open access journal and the full, final, typeset and author-corrected version of record of the manuscript is available on our site with no access controls, subscription charges or pay-per-view fees (<http://bmjopen.bmj.com>).

If you have any questions on BMJ Open's open peer review process please email [info.bmjopen@bmj.com](mailto:info.bmjopen@bmj.com)

# BMJ Open

## Prospective comparison of video laryngoscopes for emergency endotracheal intubation

|                               |                                                                                                                                                                                                                                                                                                                                                                                                                                                 |
|-------------------------------|-------------------------------------------------------------------------------------------------------------------------------------------------------------------------------------------------------------------------------------------------------------------------------------------------------------------------------------------------------------------------------------------------------------------------------------------------|
| Journal:                      | <i>BMJ Open</i>                                                                                                                                                                                                                                                                                                                                                                                                                                 |
| Manuscript ID                 | bmjopen-2018-024927                                                                                                                                                                                                                                                                                                                                                                                                                             |
| Article Type:                 | Research                                                                                                                                                                                                                                                                                                                                                                                                                                        |
| Date Submitted by the Author: | 01-Jul-2018                                                                                                                                                                                                                                                                                                                                                                                                                                     |
| Complete List of Authors:     | Suzuki, Kei; Hiroshima University, Department of Emergency and Critical Care Medicine, Graduate School of Biomedical Sciences<br>Kusunoki, Shinji; Hiroshima Prefectural Hospital, Critical Care Medical Center<br>Tanigawa, Koichi ; Fukushima Medical University, Fukushima Global Medical Science Center<br>Shime, Nobuaki; Hiroshima University, Department of Emergency and Critical Care Medicine, Graduate School of Biomedical Sciences |
| Keywords:                     | Emergency intubation, tracheal intubation, laryngoscopy, video-assisted laryngoscopy, video laryngoscope, ACCIDENT & EMERGENCY MEDICINE                                                                                                                                                                                                                                                                                                         |
|                               |                                                                                                                                                                                                                                                                                                                                                                                                                                                 |

SCHOLARONE™  
Manuscripts

Peer Review Only

*Original articles*

**Prospective comparison of video laryngoscopes  
for emergency endotracheal intubation**

Kei SUZUKI<sup>1</sup>, M.D., Shinji KUSUNOKI<sup>2</sup>, M.D., Ph.D., Koichi TANIGAWA<sup>3</sup>, M.D., Ph.D.,

5 Nobuaki SHIME<sup>1</sup>, M.D., Ph.D.

**From**

<sup>1</sup>Department of Emergency and Critical Care Medicine, Graduate School of Biomedical Sciences, Hiroshima University, Hiroshima, Japan

<sup>2</sup>Critical Care Medical Center, Hiroshima Prefectural Hospital, Hiroshima, Japan

10 <sup>3</sup>Fukushima Global Medical Science Center, Fukushima Medical University, Fukushima, Japan

**E-mail addresses:**

Kei Suzuki: [suzukik@hiroshima-u.ac.jp](mailto:suzukik@hiroshima-u.ac.jp)

15 Shinji Kusunoki: [kusunokish@gmail.com](mailto:kusunokish@gmail.com)

Koichi Tanigawa: [tanigawa@fmu.ac.jp](mailto:tanigawa@fmu.ac.jp)

Nobuaki Shime: [nshime@hiroshima-u.ac.jp](mailto:nshime@hiroshima-u.ac.jp)

**Corresponding author**

20 Nobuaki Shime, MD, PhD

Professor & Chief, Department of Emergency and Critical Care Medicine

Graduate School of Biomedical Sciences, Hiroshima University

1-2-3 Kasumi, Minami-ku,

Hiroshima 734-8551, Japan

25 Phone: +81-82-257-5456 Fax: +81-82-257-5589

e-mail: [nshime@hiroshima-u.ac.jp](mailto:nshime@hiroshima-u.ac.jp)

## Abstract

**Objective:** Video laryngoscopes are used for management of difficult airways. This study

compares the performance of the Pentax-Airway Scope™ (PAS), King Vision® (KV),

McGrath® MAC (MCG) and Macintosh laryngoscope (ML) in emergency tracheal

5 intubations (TI).

**Setting:** Two tertiary-level hospitals in Japan.

**Participants:** All consecutive video-recorded cases of emergency TI in emergency

departments and intensive care units between December 2013 and June 2015.

**Outcomes:** The primary study endpoint was success rate of first attempts at TI. A subanalysis  
10 examined the success of first attempts by expert versus non-expert operators. A logistic  
regression analysis was performed to identify predictors of successful first attempts.

**Results:** 287 emergency TI were included. TI was successful in 78% of first attempts with  
PAS, 58% with KV, 78% with MCG, and 58% with ML (P=0.004). In post hoc analysis, the  
success rates with PAS and MCG were significantly higher than with KV and ML. The  
15 success rates by non-expert operators were significantly higher (P=0.00004) with PAS (87%)  
and MCG (78%), than with KV (50%) and ML (46%), though not when performed by experts  
(67% with PAS vs. 67% with MCG vs. 78% with KV vs. 78% with ML, P=0.556). After  
adjustments for TI indications, difficult airway characteristics, and expert versus non-expert

operator, PAS (odds ratio = 3.422, 95% confidence interval 1.551-7.550; P=0.002) and MCG (3.758, 1.640-8.612; P=0.002) were associated with higher odds of successful first attempt.

**Conclusion:** PAS and MCG were associated with significantly higher success rates of first attempts at emergency TI than KV and ML, especially by non-expert operators.

5 **Trial registration:** UMIN000027925

**Keywords:** Emergency intubation, tracheal intubation, laryngoscopy, video-assisted laryngoscopy, video laryngoscope

1  
2  
3  
4 Strengths and limitations of this study  
5  
6

- 7 • This study is the first report directly comparing the three different types of VLs  
8  
9  
10 (Pentax-Airway Scope™ (PAS), the King Vision® (KV), the McGrath™ MAC (MCG) )  
11  
12  
13 and ML in the emergency TI.  
14  
15

- 16 5 • Significantly higher successful rates shown in PAS and MCG, especially when operated  
17  
18  
19 by non-experts, is another strength of this study possibly affecting clinical practice.  
20  
21

- 22 • Major limitation of this study is its observational design. Although we tried to adjust for  
23  
24  
25 almost all possible confounding factors based on previous studies, we cannot totally  
26  
27  
28  
29 exclude other unnoticed confounding factors influencing the results,  
30  
31

32 10  
33  
34  
35  
36  
37  
38  
39  
40  
41  
42  
43  
44  
45  
46  
47  
48  
49  
50  
51  
52  
53  
54  
55  
56  
57  
58  
59  
60

## Background

Tracheal intubation (TI) performed in emergency setting is more challenging than when attempted in an operating room, because of patients, operators and environmental factors [1-3]. Consequently, the success rate is lower, the time needed to undertake the TI is longer and the complication rate is higher [1, 2, 4, 5].

Video laryngoscopes (VL) are increasingly being used to increase the safety and success rate of emergency TI. The main VL used in clinical practice are the Pentax-Airway Scope™ (PAS; HOYA Corporation, Tokyo, Japan), the King Vision® (KV; King Systems, Noblesville, IN) and the McGrath™ MAC (MCG; Medtronic Inc, Minneapolis, MN). VL are classified by the guidance method of the tracheal tube. PAS and KV are L-shaped, with an attachment of the tracheal tube to the blade, while MCG has no attachment, which facilitates the flexible orientation of the tube. Compared with the Macintosh laryngoscope (ML), the superiority of VL in viewing the glottis and in successfully completing TI has been confirmed in a manikin model [6], in patients undergoing elective surgery [7-10], and in patients presenting in emergency rooms [11-13]. No study, however, has examined the relative performance of VL, especially in emergency TI.

The identification of the optimal VL is important, in view of a) the high failure rate of

1  
2  
3  
4 emergency TI in the emergency department (ED) and the intensive care unit (ICU), and b) the  
5  
6  
7 increased incidence of adverse events associated with unsuccessful attempts [14, 15].  
8  
9

10 The aim of this study was to identify the optimal VL among PAS, KV, MCG and ML  
11  
12  
13 in the emergency performance of TI in the ED or the ICU.  
14

15  
16 5  
17  
18  
19  
20  
21  
22  
23  
24  
25  
26  
27  
28  
29  
30  
31  
32  
33  
34  
35  
36  
37  
38  
39  
40  
41  
42  
43  
44  
45  
46  
47  
48  
49  
50  
51  
52  
53  
54  
55  
56  
57  
58  
59  
60



## Methods

### Study design and setting

This prospective, observational study was conducted at a university hospital and at a general, public hospital. The study protocol was approved by the institutional review boards of both institutions. Both boards waived the need to obtain the patients' informed consents before collecting the data. We disclosed the information regarding this study by web page and offered an opportunity to opt out.

The ED and ICU of both institutions treated ambulatory and postoperative, medical and surgical, pediatric and adult patients. The physicians were responsible for primary care in the ED and for critical care in the ICU. Both were staffed by board-certified attending physicians in emergency or intensive care medicine, or by anesthesiologists, and by post-graduate residents (years 3-7) in emergency medicine, anesthesiology and internal medicine. In addition, transitional post-graduate residents (years 1 and 2) rotated for several months in the ED and ICU. Most of the transitional year residents completed  $\geq 1$  month of training in anesthesiology in the operating room, during which they performed TI, using ML in patients undergoing general anesthesia, under the supervision of attending anesthesiologists. When difficult airways or cervical instability were anticipated, the choice

of VL was left to the discretion of the supervisors.

PAS (model S100L), KV, MCG and ML were available for this study. Channeled disposable blades were used with the KV. The laryngoscopes, drugs, or operators for the TI procedures were chosen by the attending physician(s) without protocol. Using a hand-held or fixed camera, the procedures were systematically video-recorded for archival and quality control.

### **Study participants**

We included consecutive video-recorded cases of emergency TI performed in the ED and ICU of both institutions between December 2013 and June 2015.

### **Data collection and measurements**

We recorded the patients demographic and clinical characteristics, indications for TI (cardiopulmonary arrest, airway obstruction, respiratory failure, hemodynamic instability or altered mental status), drugs used for TI (sedatives, analgesics or muscle relaxants), pre-procedurally defined complicating airway characteristics, including obesity (body mass index  $\geq 28$ ), limited mouth opening (inter-incisor distance  $< 4$  cm), restricted neck

1  
2  
3  
4 mobilization, short neck (thyro-mental distance <6 cm), facial trauma (diagnosed clinically  
5  
6  
7 and by imaging), edema of the glottis visualized by the operator, and presence of blood,  
8  
9  
10 secretions or vomitus in the airways, needing suction or interfering with the procedure. The  
11  
12  
13 laryngoscopes used, the length of clinical experience and the specialty of the operators were  
14  
15  
16 5 recorded. The subjective difficulty, using a visual analogue scale between 0 (easy) and 100  
17  
18  
19 (difficult) was scored by the operators. The success of first attempts at TI, the number of  
20  
21  
22 attempts until successful TI, the changes of laryngoscopes and operators, the time between  
23  
24  
25 insertion of the laryngoscope into the mouth and the onset of ventilation after TI, the  
26  
27  
28 complications (edema or spasm of the glottis, dental injuries, regurgitation and airway  
29  
30  
31 10 hemorrhages), esophageal intubations, and the laryngoscope in use when the complication or  
32  
33  
34 the esophageal intubation occurred, were recorded. The data were collected from the video  
35  
36  
37 recording for measurements of variables, in addition to medical records and a questionnaire.  
38  
39  
40  
41  
42  
43  
44

### 45 **Study endpoints**

46  
47  
48 15 The primary study endpoint was the rate of successful first attempt at TI, and the secondary  
49  
50  
51 endpoints were the time needed to perform the procedure, the subjective difficulty score,  
52  
53  
54 procedural complications and esophageal intubation.  
55  
56  
57  
58  
59  
60

## Sample size and statistical analysis

Estimated sample size was based on a previous TI study performed by residents in patients undergoing elective surgery, where the rates of successful first attempts, using the ML and PAS were 64 and 90%, respectively. Assuming a 20% difference in rates of successful first attempts between two laryngoscopes, we calculated a sample size of 62 procedures in each group at the 5%  $\alpha$  level and a power ( $1-\beta$ ) of 80%. Including missing data, we set the sample sizes of each group at 70, and at a total of 280 procedures.

Categorical variables are expressed as counts and percentages, and continuous variables as means  $\pm$  standard deviations. We compared the outcomes among the 4 laryngoscopes by Fisher's exact or Kruskal-Wallis tests. The procedures without an accurate measurement of time needed to perform the TI from the video recording and the procedures without descriptions of the subjective difficulty score were excluded from the each analysis. *A post hoc* analysis was performed, using Turkey's test for all paired comparisons. We also examined whether the rates of successful first attempts differed among the 4 laryngoscopes, in each pre-specified subgroups, according to the duration of clinical experience (1<sup>st</sup> and 2<sup>nd</sup> post-graduate years as non-expert operators;  $\geq 3^{\text{rd}}$  post-graduate year as experts). A logistic

1  
2  
3  
4 regression analysis was performed to identify factors influencing the successful first attempt  
5  
6  
7 rate. We included possible confounding factors, which were significantly different among the 4  
8  
9  
10 laryngoscopes (indication for TI and restricted neck mobility) and which were identified in  
11  
12  
13 previous studies (limited mouth aperture,<sup>16</sup> blood, secretion or vomitus in the airways,<sup>17</sup> experts  
14  
15  
16 5 versus non-expert operator<sup>18</sup>). A P value  $< 0.05$  was considered statistically significant. The  
17  
18  
19 analyses were performed using the SPSS<sup>®</sup> statistical package, version 23 (IBM Corporation,  
20  
21  
22  
23 Armonk, NY).

## Results

### Characteristics of the study population

The patients characteristics are summarized in table 1. Two-hundred and eighty-seven patients underwent video-recorded emergency TI. Among the indications for TI, hemodynamic instability was significantly different among the 4 laryngoscopes, with MCG most frequently used in presence of hemodynamic instability. Complicating airway characteristics were present in 56% of cases, consisting of blood, secretions or vomitus in the airways in 123 procedures (43%). PAS was often used during procedures complicated by a restricted neck mobility. Among the 67 non-experts, 57 operators (89.1%) had received some anesthesiology training in the operating room. They performed 33±14 TI, including 6±5 procedures using VL with PAS or MCG. TI was interrupted in 3 cases (1%), of which one was managed without TI, another underwent emergency cricothyroidotomy, and a third suffered a fatal cardiopulmonary arrest. In the remaining 284 procedures, TI was attempted once in 199 (69%), twice in 49 (17%) and >twice in 36 instances (13%). The laryngoscope was replaced in 22 cases (8%). Out of 59 procedures, the KV was replaced by another laryngoscope in 9 instances (15%; P=0.043 vs. other groups). The KV was replaced by another device in 7 procedures because of separation of the laryngoscope from its disposable

1  
2  
3  
4 blade. The operator was replaced in 21 attempts at TI (7%), of which 19 were initially made  
5  
6  
7 by a non-expert operator. The number of operators were similarly replaced in the 4 study  
8  
9  
10 groups.

## 5 **Main results**

11  
12  
13  
14  
15  
16  
17  
18  
19 The overall rate of successful first attempts was 69% and differed significantly ( $P=0.004$ )  
20  
21  
22 among the 4 laryngoscopes (table 2). In *post hoc* analysis, the rates of successful first  
23  
24  
25 attempts were higher with AWS and MCG than with KV or ML, though the difference was  
26  
27  
28 significant only in the subgroup of non-expert operators (table 2). The rates of successful first  
29  
30  
31 attempts were similar in non-experts and experts. By logistic regression analysis with  
32 10 adjustments for indication of TI, restricted neck mobilization, limited mouth opening,  
33  
34  
35 bloods/secretion/vomit in the airway and experts/non-expert, the use of PAS and MCG was  
36  
37  
38 associated with significantly higher rates of successful first attempts at TI (table 3).  
39  
40  
41  
42  
43

44  
45  
46  
47  
48 15 There was a significant difference in time needed to perform TI among the 4  
49  
50  
51 laryngoscopes, though no difference was found in the *post hoc* analysis. There was a  
52  
53  
54 significant difference in the difficulty scores among the 4 laryngoscopes and the use of MCG  
55  
56  
57 was significantly easier than ML in the *post hoc* analysis (table 4).  
58  
59  
60

1  
2  
3  
4                   Complications of TI occurred in 21 procedures (7%), consisting of 1 dental  
5  
6  
7                   trauma, 7 spasms or edemas of the glottis, 5 instances of regurgitation and 10 hemorrhages,  
8  
9  
10                  though there was no significant difference among the 4 laryngoscopes. The esophagus was  
11  
12  
13                  intubated in 3 instances (1.2%) by non-experts using the ML.  
14

5

For peer review only



## Discussion

In this prospective, observational, two-center study, after adjustments for confounding factors, the success rates of first attempts at emergency TI were significantly higher with PAS or MCG than with KV or ML, when performed by non-expert operators. The use of MCG was associated with a lower subjective difficulty of performing TI than the use of ML.

A previous study of VL for TI by experienced anesthetists in the operating room revealed a better visualization of the glottis with PAS than with ML, while the success rates and TI procedure times were similar [8]. Moreover, studies with inexperienced residents revealed a 96% success rate at first attempt with PAS, versus 70% with ML, and 44 sec to secure the airways with PAS, versus 71 sec with ML [9]. Our results are concordant with these success rates, suggesting advantageous characteristics of PAS, specifically with novice operators. The suitable shape of the PBLADE<sup>®</sup>, which indirectly visualizes the glottis regardless of the head and neck position, the existence of a blade channel to set the tracheal tube and the guiding function of the target mark on the screen, supports the preferential use of PAS among the VL [19].

MCG is a relatively compact device without tracheal tube guide channel [20].

Like ML, it offers an indirect view of the glottis by flexible manipulations of the

1  
2  
3  
4 laryngoscope and tracheal tube. Several factors, therefore, such as a restricted neck mobility  
5  
6  
7 or the operator's experience with TI might influence the success rate of PAS versus MCG.  
8

9  
10 However, the rates of successful first attempt at TI were nearly the same with PAS and MCG  
11  
12  
13 in this study population. A randomized study comparing the performance of PAS versus  
14

15  
16  
17 5 MCG in emergency TI seems warranted.  
18

19  
20 This study was the first to compare PAS versus KV in clinical settings. Although  
21  
22 they have similar shapes and tracheal tube guiding characteristics, the rate of successful first  
23  
24  
25 attempt was significantly lower with KV than with PAS. The orientation of the KV tracheal  
26  
27  
28 tube is relatively downward compared with PAS, interfering with its advancement. In  
29  
30  
31  
32 10 addition, KV has no marking to help in the placement of the tube. Malfunction of the system,  
33  
34  
35 which occurred in 7 patients in this study, may also have lowered the success rate of KV.  
36  
37

38  
39 Several factors, which varied among the 4 laryngoscopes, had repercussions on the  
40  
41 success rate of TI. Blood or vomitus in the airways, an important complication when  
42  
43  
44 performing TI in emergency, may lower the image quality. Blood, secretions or vomitus were  
45  
46  
47  
48 15 present in the airways in 43% of procedures, significantly lowering the rate of successful first  
49  
50  
51 attempts [17]. However, after adjustment for this factor, the multiple variable analysis  
52  
53  
54 confirmed the advantage of using PAS and MCG. A limited mouth aperture was also  
55  
56  
57  
58  
59  
60

1  
2  
3  
4 correlated with the difficulty of TI [16]. This, however, was problematic in only 6% of cases  
5  
6  
7 and did not represent a major obstacle to the insertion of the devices.  
8  
9  
10

### 11 12 13 **Limitations of our study** 14

15  
16 5 This was an observational study, in which confounding factors may have influenced the  
17  
18 success rate of TI and biased the results. We adjusted, however, for possible confounding  
19  
20 factors based on previous studies, and found a significant relationship between VL and rate of  
21  
22 successful first attempts. Furthermore, we classified the "non-experts" on the basis of their  
23  
24 clinical experience. A precise index to grade the level of intubation skill might have been  
25  
26 preferable, although it does not currently exist. Finally, bias based on operator's familiarity  
27  
28 with each laryngoscope cannot be excluded. However, given the scarce overall experience of  
29  
30 TI itself prior to this study (4.6 times/person), the results of Non-expert group are likely to be  
31  
32 10 less biased.  
33  
34  
35  
36  
37  
38  
39  
40  
41  
42  
43  
44  
45  
46  
47  
48  
49  
50  
51  
52  
53  
54  
55  
56  
57  
58  
59  
60

## Conclusion

When performing emergency TI in the ED or the ICU, PAS and MCG were associated with significantly higher rates of successful first attempts, especially when operated by non-experts.

5

For peer review only

## List of Abbreviations

|    |     |                            |
|----|-----|----------------------------|
|    | ML  | Macintosh laryngoscope     |
|    | TI  | tracheal intubation        |
|    | VL  | video laryngoscope         |
| 5  | AWS | Pentax-Airway Scope™       |
|    | KV  | King Vision®               |
|    | McG | McGrath® MAC               |
|    | TT  | tracheal tube              |
|    | ED  | emergency department       |
| 10 | ICU | intensive care unit        |
|    | IRB | institutional review board |
|    | PGY | post-graduate year         |
|    | DAF | difficult airway factors   |
|    | FAS | first attempt success      |

15

## Declarations

**Acknowledgements:** We thank the attending physicians and residents from the department of emergency and critical care medicine of Hiroshima University and from the critical care medical center of Hiroshima prefectural hospital who contributed to the data collection.

**Contributions:** Suzuki conceived the study, designed the trial, collected and managed the data. Kusunoki, Tanigawa and Shime supervised the conduct of the trial and data collection. Suzuki drafted the manuscript, and all authors contributed substantially to its revision. Suzuki takes responsibility for the paper as a whole.

**Funding:** This work was supported by KAKENHI Grants from the Japan Society for the Promotion of Science (JSPS) (Numbers JP 17K11573).

**Competing interests:** The authors declare that they have no competing interests.

1  
2  
3  
4 **Ethics approval and consent to participate:** This study was reviewed and approved by the  
5  
6  
7 research ethics committee of Hiroshima University (No.1069) and Hiroshima prefectural  
8  
9  
10 hospital (No.2013-76).

11  
12  
13  
14  
15  
16 5 **Trial registration number:** University Hospital Medical Information Network  
17  
18  
19 Clinical Trials Registry (UMIN000027925,  
20  
21  
22 [https://upload.umin.ac.jp/cgi-open-bin/ctr\\_e/ctr\\_view.cgi?recptno=R000016182](https://upload.umin.ac.jp/cgi-open-bin/ctr_e/ctr_view.cgi?recptno=R000016182)); date of  
23  
24  
25 registration 26.06.2017 (retrospectively registered)  
26  
27  
28  
29  
30  
31

32 10 **Consent for publication:** Not applicable.  
33  
34  
35  
36  
37

38 **Data sharing statement:** No additional data available.  
39  
40  
41  
42  
43

44 **Patient and Public Involvement statement:** Patients were not involved.  
45  
46  
47  
48 15  
49  
50  
51  
52  
53  
54  
55  
56  
57  
58  
59  
60

## References

1. Martin LD, Mhyre JM, Shanks AM, *et al.* 3,423 emergency tracheal intubations at a university hospital: airway outcomes and complications. *Anesthesiology* 2011;114:42-48.
2. Schmidt UH, Kumwilaisak K, Bittner E, *et al.* Effects of supervision by attending anesthesiologists on complications of emergency tracheal intubation. *Anesthesiology* 2008;109:973-977.
3. Benedetto WJ, Hess DR, Gettings E, *et al.* Urgent tracheal intubation in general hospital units: an observational study. *J Clin Anesth.* 2007;19:20-24.
4. Schwartz DE, Matthay MA, Cohen NH. Death and other complications of emergency airway management in critically ill adults. A prospective investigation of 297 tracheal intubations. *Anesthesiology* 1995;82:367-376.
5. Simpson GD, Ross MJ, McKeown DW, *et al.* Tracheal intubation in the critically ill: a multi-centre national study of practice and complications. *Br J Anaesth.* 2012;108:792-799.
6. Liu L, Tanigawa K, Kusunoki S, *et al.* Tracheal intubation of a difficult airway using Airway Scope, Airtraq, and Macintosh laryngoscope: a comparative manikin study of



- 1  
2  
3  
4 inexperienced personnel. *Anesth Analg*. 2010;110:1049-1055.  
5  
6  
7 7. Carlson JN, Brown CA. Does the use of video laryngoscopy improve intubation  
8  
9  
10 outcomes? *Ann Emerg Med*. 2014;64:165-166.  
11  
12  
13 8. Teoh WH, Saxena S, Shah MK, *et al*. Comparison of three videolaryngoscopes: Pentax  
14  
15  
16 5 Airway Scope, C-MAC, Glidescope vs the MacIntosh laryngoscope for tracheal  
17  
18  
19 intubation. *Anaesthesia* 2010;65:1126-1132.  
20  
21  
22 9. Hirabayashi Y, Seo N. Tracheal intubation by non-anaesthetist physicians using the  
23  
24  
25 Airway Scope. *Emerg Med J*. 2007;24:572-573.  
26  
27  
28  
29 10. Taylor AM, Peck M, Launcelott S, *et al*. The McGrath® Series 5 videolaryngoscope vs  
30  
31  
32 10 the Macintosh laryngoscope: a randomised, controlled trial in patients with a simulated  
33  
34  
35 difficult airway. *Anaesthesia* 2013;68:142-147.  
36  
37  
38  
39 11. De Jong A, Molinari N, Conseil M, *et al*. Video laryngoscopy versus direct  
40  
41  
42 laryngoscopy for orotracheal intubation in the intensive care unit: a systematic review  
43  
44  
45 and meta-analysis. *Intensive Care Med*. 2014;40:629-639.  
46  
47  
48 15 12. Silverberg MJ, Li N, Acquah SO, *et al*. Comparison of video laryngoscopy versus  
49  
50  
51 direct laryngoscopy during urgent endotracheal intubation: a randomized controlled  
52  
53  
54 trial. *Crit Care Med*. 2015;43:636-641.  
55  
56  
57  
58  
59  
60

- 1  
2  
3  
4 13. Janz DR, Semler MW, Lentz RJ, *et al.* Randomized Trial of Video Laryngoscopy for  
5  
6  
7 Endotracheal Intubation of Critically Ill Adults. *Crit Care Med.* 2016;44:1980-1987.  
8  
9
- 10 14. Hasegawa K, Shigemitsu K, Hagiwara Y, *et al.* Association between repeated  
11  
12  
13 intubation attempts and adverse events in emergency departments: An analysis of a  
14  
15  
16 5 multicenter prospective observational study. *Ann Emerg Med.* 2012;60:749-754.e2.  
17  
18
- 19 15. Sakles JC, Chiu S, Mosier J, *et al.* The importance of first pass success when  
20  
21  
22 performing orotracheal intubation in the emergency department. *Acad Emerg Med.*  
23  
24  
25 2013;20:71-78.  
26  
27
- 28 16. Breckwoldt J, Klemstein S, Brunne B, *et al.* Difficult prehospital endotracheal  
29  
30  
31 10 intubation - predisposing factors in a physician based EMS. *Resuscitation*  
32  
33  
34 2011;82:1519-1524.  
35  
36  
37
- 38 17. Gaither JB, Spaite DW, Stolz U, *et al.* Prevalence of difficult airway predictors in cases  
39  
40  
41 of failed prehospital endotracheal intubation. *J Emerg Med* 2014;47(3):294-300.  
42  
43
- 44 18. Crewdson K, Lockey DJ, Røislien J, *et al.* The success of pre-hospital tracheal  
45  
46  
47 15 intubation by different pre-hospital providers: a systematic literature review and  
48  
49  
50 meta-analysis. *Crit Care* 2017;21:31.  
51  
52  
53
- 54 19. Koyama J, Aoyama T, Kusano Y, *et al.* Description and first clinical application of  
55  
56  
57  
58  
59  
60

1  
2  
3  
4 AirWay Scope for tracheal intubation. *J Neurosurg Anesth.* 2006;18:247-250.  
5  
6

7 20. Kotera A, Irie H, Iwashita S, *et al.* Comparison of the McGrath MAC video  
8  
9

10 laryngoscope and the Pentax Airwayscope during chest compression: a manikin study.  
11  
12

13 *J Intensive Care* 2014;2:18.  
14  
15  
16  
17  
18  
19  
20  
21  
22  
23  
24  
25  
26  
27  
28  
29  
30  
31  
32  
33  
34  
35  
36  
37  
38  
39  
40  
41  
42  
43  
44  
45  
46  
47  
48  
49  
50  
51  
52  
53  
54  
55  
56  
57  
58  
59  
60

**Table 1. Baseline and difficult airway characteristics**

|                                                     | All<br>(n=287) | Pentax-Airway<br>(n=82) | King VISION<br>(n=59) | McGrath<br>(n=82) | Macintosh<br>(n=64) | P     |
|-----------------------------------------------------|----------------|-------------------------|-----------------------|-------------------|---------------------|-------|
| Men                                                 | 165 (57.5)     | 54 (65.9)               | 31 (52.5)             | 51 (62.2)         | 29 (45.3)           | 0.057 |
| Age                                                 | 65.4±20.5      | 60.7±24.8               | 69.0±16.2             | 67.4±17.1         | 65.7±21.4           | 0.457 |
| Height, cm                                          | 158.1±14.4     | 156.9±19.3              | 159.3±9.0             | 160.9±10.2        | 154.9±14.9          | 0.044 |
| Weight, kg                                          | 55.9±13.9      | 56.3±16.9               | 56.2±10.2             | 56.7±11.9         | 54.0±15.2           | 0.400 |
| Body mass index                                     | 22.0±3.7       | 22.3±3.8                | 22.1±3.6              | 21.7±3.2          | 22.1±4.2            | 0.794 |
| Expert operators                                    | 131 (45.6)     | 36 (43.9)               | 27 (45.8)             | 45 (54.9)         | 23 (35.9)           | 0.149 |
| Indications for tracheal intubation                 |                |                         |                       |                   |                     |       |
| Cardiopulmonary arrest                              | 114 (39.7)     | 34 (41.5)               | 26 (44.1)             | 25 (30.5)         | 29 (45.3)           | 0.220 |
| Airway obstruction                                  | 14 (4.9)       | 4 (4.9)                 | 1 (1.7)               | 7 (8.5)           | 2 (3.1)             | 0.305 |
| Respiratory failure                                 | 45 (15.7)      | 12 (14.6)               | 11 (18.6)             | 14 (17.1)         | 8 (12.5)            | 0.789 |
| Hemodynamic instability                             | 32 (11.1)      | 6 (7.3)                 | 2 (3.4)               | 20 (24.4)         | 4 (6.3)             | 0.000 |
| Altered mental status                               | 82 (28.6)      | 26 (31.7)               | 19 (32.2)             | 16 (19.5)         | 21 (32.8)           | 0.182 |
| Drugs used for tracheal intubation                  |                |                         |                       |                   |                     |       |
| None                                                | 148 (51.6)     | 44 (53.7)               | 32 (54.2)             | 35 (42.7)         | 37 (57.8)           | 0.274 |
| Sedatives                                           | 116 (40.4)     | 33 (40.2)               | 24 (40.7)             | 35 (42.7)         | 24 (37.5)           | 0.944 |
| Analgesics                                          | 91 (31.7)      | 22 (26.8)               | 15 (25.4)             | 36 (43.9)         | 18 (28.1)           | 0.053 |
| Muscle relaxants                                    | 59 (20.6)      | 15 (18.3)               | 10 (16.9)             | 22 (26.8)         | 12 (18.8)           | 0.450 |
| Drugs used for tracheal intubation in Non-CPA cases | (n=173)        | (n=48)                  | (n=33)                | (n=57)            | (n=35)              |       |
| None                                                | 34 (19.7)      | 10 (20.8)               | 6 (18.2)              | 10 (17.5)         | 8 (22.9)            | 0.925 |
| Sedatives                                           | 116 (67.1)     | 33 (68.8)               | 24 (72.7)             | 35 (61.4)         | 24 (68.6)           | 0.722 |
| Analgesics                                          | 91 (52.6)      | 22 (45.8)               | 15 (45.5)             | 36 (63.2)         | 18 (51.4)           | 0.250 |
| Muscle relaxants                                    | 59 (34.1)      | 15 (31.3)               | 10 (30.3)             | 22 (38.6)         | 12 (34.3)           | 0.842 |
| Difficult airway characteristics                    |                |                         |                       |                   |                     |       |
| Obesity                                             | 16 (5.6)       | 6 (7.3)                 | 3 (5.1)               | 3 (3.7)           | 4 (6.3)             | 0.793 |
| Limited mouth opening                               | 17 (5.9)       | 5 (6.1)                 | 5 (8.5)               | 6 (7.3)           | 1 (1.6)             | 0.319 |
| Restricted neck mobilization                        | 39 (13.6)      | 19 (23.2)               | 6 (10.2)              | 7 (8.5)           | 7 (10.9)            | 0.040 |
| Short neck                                          | 9 (3.1)        | 3 (3.7)                 | 1 (1.7)               | 3 (3.7)           | 2 (3.1)             | 0.937 |
| Facial trauma                                       | 13 (4.5)       | 7 (8.5)                 | 1 (1.7)               | 4 (4.9)           | 1 (1.6)             | 0.171 |
| Edema of glottis                                    | 7 (2.4)        | 2 (2.4)                 | 0 (0.0)               | 4 (4.9)           | 1 (1.6)             | 0.390 |
| Bloods, secretion or vomitus in airway              | 123 (42.9)     | 36 (43.9)               | 23 (39.0)             | 38 (46.3)         | 26 (40.6)           | 0.821 |
| Cases with difficult airway characteristics         | 161 (56.1)     | 47 (57.3)               | 31 (52.5)             | 48 (58.5)         | 35 (54.7)           | 0.897 |

Values are numbers (%) of observations or means ± standard deviations.

**Table 2. Success rates of first attempts at tracheal intubations with 4 laryngoscopes**

|                          | All laryngoscopes | Pentax-Airway Scope | King VISION | McGrath  | Macintosh | P       |
|--------------------------|-------------------|---------------------|-------------|----------|-----------|---------|
| All operators, n         | 287               | 82                  | 59          | 82       | 64        |         |
| Successful first attempt | 199 (69)          | 64 (78)*            | 34 (58)     | 64 (78)† | 37 (58)   | 0.004   |
| Non-expert operators     | 156               | 46                  | 32          | 37       | 41        |         |
| Successful first attempt | 104 (67)          | 40 (87)‡            | 16 (50)     | 29 (78)§ | 19 (46)   | 0.00004 |
| Expert operators         | 131               | 36                  | 27          | 45       | 23        |         |
| Successful first attempt | 95 (73)           | 24 (67)             | 18 (67)     | 35 (78)  | 18 (78)   | 0.556   |

Values are numbers (%) of observations; *post hoc* analyses were performed using Tukey’s test for paired comparisons of 4 laryngoscopes.

\*:vs. King VISION P=0.043, \*:vs. Macintosh P=0.039, †:vs. King VISION P=0.043, †:vs. Macintosh P=0.039

‡:vs. King VISION P=0.002, ‡:vs. Macintosh P<0.001, §:vs. King VISION P=0.043, §:vs. Macintosh P=0.009

5

**Table 3. Multiple variable analysis of factors influencing the success rate of first attempts at tracheal intubations**

| Factors                                   | Odd ratios    | 95% confidence intervals | P     |
|-------------------------------------------|---------------|--------------------------|-------|
| Laryngoscopes                             |               |                          |       |
| Macintosh (reference)                     | 1             | -                        | -     |
| Pentax-Airway Scope                       | 3.422         | 1.551-7.550              | 0.002 |
| King VISION                               | 1.056         | 0.487-2.289              | 0.889 |
| McGrath                                   | 3.758         | 1.640-8.612              | 0.002 |
| Indications for tracheal intubation       |               |                          |       |
| Cardiopulmonary arrest                    | 1 (reference) |                          |       |
| Airway obstruction                        | 0.226         | 0.063-0.812              | 0.023 |
| Respiratory failure                       | 0.720         | 0.284-1.822              | 0.488 |
| Hemodynamic instability                   | 0.380         | 0.137-1.054              | 0.063 |
| Altered mental status                     | 0.361         | 0.180-0.723              | 0.004 |
| Difficult airway characteristics          |               |                          |       |
| Mouth opening                             |               |                          |       |
| Unlimited                                 | 1 (reference) | -                        | -     |
| Limited                                   | 0.092         | 0.026-0.323              | 0.000 |
| Neck mobility                             |               |                          |       |
| Unrestricted                              | 1 (reference) | -                        | -     |
| Restricted                                | 0.951         | 0.414-2.182              | 0.905 |
| Blood, secretions, vomitus in the airways |               |                          |       |
| Absent                                    | 1 (reference) | -                        | -     |
| Present                                   | 0.455         | 0.257-0.804              | 0.007 |
| Operators                                 |               |                          |       |
| Non-expert                                | 1 (reference) | -                        | -     |
| Expert                                    | 1.688         | 0.916-3.108              | 0.093 |

**Table 4. Comparisons of times needed to perform tracheal intubations and of difficulty scores, using 4 different laryngoscopes**

|                                  | Overall       | Pentax-Airway | King VISION  | McGrath       | Macintosh    | P     |
|----------------------------------|---------------|---------------|--------------|---------------|--------------|-------|
| Time to perform intubations, sec | 60±31 (n=269) | 63±34 (n=78)  | 63±31 (n=45) | 62±31 (n=79)  | 52±27 (n=67) | 0.043 |
| Difficulty score <sup>†</sup>    | 39±27 (n=258) | 39±26 (n=72)  | 43±26 (n=45) | 32±27* (n=78) | 45±26 (n=63) | 0.009 |

Values are means ± standard deviations; \*P=0.027 vs. Macintosh laryngoscope.

<sup>†</sup>Difficulty was scored by visual analogue scale, from very easy (0) to very difficult (100).

5 *post hoc* analyses were performed using Tukey's test for paired comparisons of 4 laryngoscopes.

peer review only

STROBE Statement—Checklist of items that should be included in reports of *cohort studies*

|                           | Item No | Recommendation                                                                                                                                                                                    | Reported on page No |
|---------------------------|---------|---------------------------------------------------------------------------------------------------------------------------------------------------------------------------------------------------|---------------------|
| <b>Title and abstract</b> | 1       | (a) Indicate the study's design with a commonly used term in the title or the abstract                                                                                                            | 1, 2                |
|                           |         | (b) Provide in the abstract an informative and balanced summary of what was done and what was found                                                                                               | 2-3                 |
| <b>Introduction</b>       |         |                                                                                                                                                                                                   |                     |
| Background/rationale      | 2       | Explain the scientific background and rationale for the investigation being reported                                                                                                              | 4-5                 |
| Objectives                | 3       | State specific objectives, including any prespecified hypotheses                                                                                                                                  | 4-5                 |
| <b>Methods</b>            |         |                                                                                                                                                                                                   |                     |
| Study design              | 4       | Present key elements of study design early in the paper                                                                                                                                           | 6-8                 |
| Setting                   | 5       | Describe the setting, locations, and relevant dates, including periods of recruitment, exposure, follow-up, and data collection                                                                   | 6                   |
| Participants              | 6       | (a) Give the eligibility criteria, and the sources and methods of selection of participants. Describe methods of follow-up                                                                        | 7                   |
|                           |         | (b) For matched studies, give matching criteria and number of exposed and unexposed                                                                                                               |                     |
| Variables                 | 7       | Clearly define all outcomes, exposures, predictors, potential confounders, and effect modifiers. Give diagnostic criteria, if applicable                                                          | 7-8                 |
| Data sources/measurement  | 8*      | For each variable of interest, give sources of data and details of methods of assessment (measurement). Describe comparability of assessment methods if there is more than one group              | 7-8                 |
| Bias                      | 9       | Describe any efforts to address potential sources of bias                                                                                                                                         | 8                   |
| Study size                | 10      | Explain how the study size was arrived at                                                                                                                                                         | 9                   |
| Quantitative variables    | 11      | Explain how quantitative variables were handled in the analyses. If applicable, describe which groupings were chosen and why                                                                      | 7-8                 |
| Statistical methods       | 12      | (a) Describe all statistical methods, including those used to control for confounding                                                                                                             | 9-10                |
|                           |         | (b) Describe any methods used to examine subgroups and interactions                                                                                                                               | 9                   |
|                           |         | (c) Explain how missing data were addressed                                                                                                                                                       | 9                   |
|                           |         | (d) If applicable, explain how loss to follow-up was addressed                                                                                                                                    |                     |
|                           |         | (e) Describe any sensitivity analyses                                                                                                                                                             |                     |
| <b>Results</b>            |         |                                                                                                                                                                                                   |                     |
| Participants              | 13*     | (a) Report numbers of individuals at each stage of study—eg numbers potentially eligible, examined for eligibility, confirmed eligible, included in the study, completing follow-up, and analysed | 11                  |
|                           |         | (b) Give reasons for non-participation at each stage                                                                                                                                              |                     |
|                           |         | (c) Consider use of a flow diagram                                                                                                                                                                |                     |
| Descriptive data          | 14*     | (a) Give characteristics of study participants (eg demographic, clinical, social) and information on exposures and potential confounders                                                          | 25                  |
|                           |         | (b) Indicate number of participants with missing data for each                                                                                                                                    | 11                  |



|                          |     | variable of interest                                                                                                                                                                                         |           |
|--------------------------|-----|--------------------------------------------------------------------------------------------------------------------------------------------------------------------------------------------------------------|-----------|
|                          |     | (c) Summarise follow-up time (eg, average and total amount)                                                                                                                                                  |           |
| Outcome data             | 15* | Report numbers of outcome events or summary measures over time                                                                                                                                               | 12-13, 26 |
| Main results             | 16  | (a) Give unadjusted estimates and, if applicable, confounder-adjusted estimates and their precision (eg, 95% confidence interval). Make clear which confounders were adjusted for and why they were included | 26, 27    |
|                          |     | (b) Report category boundaries when continuous variables were categorized                                                                                                                                    |           |
|                          |     | (c) If relevant, consider translating estimates of relative risk into absolute risk for a meaningful time period                                                                                             |           |
| Other analyses           | 17  | Report other analyses done—eg analyses of subgroups and interactions, and sensitivity analyses                                                                                                               | 12, 26    |
| <b>Discussion</b>        |     |                                                                                                                                                                                                              |           |
| Key results              | 18  | Summarise key results with reference to study objectives                                                                                                                                                     | 14        |
| Limitations              | 19  | Discuss limitations of the study, taking into account sources of potential bias or imprecision. Discuss both direction and magnitude of any potential bias                                                   | 16        |
| Interpretation           | 20  | Give a cautious overall interpretation of results considering objectives, limitations, multiplicity of analyses, results from similar studies, and other relevant evidence                                   | 14        |
| Generalisability         | 21  | Discuss the generalisability (external validity) of the study results                                                                                                                                        | 16        |
| <b>Other information</b> |     |                                                                                                                                                                                                              |           |
| Funding                  | 22  | Give the source of funding and the role of the funders for the present study and, if applicable, for the original study on which the present article is based                                                | 20        |

\*Give information separately for exposed and unexposed groups.

**Note:** An Explanation and Elaboration article discusses each checklist item and gives methodological background and published examples of transparent reporting. The STROBE checklist is best used in conjunction with this article (freely available on the Web sites of PLoS Medicine at <http://www.plosmedicine.org/>, Annals of Internal Medicine at <http://www.annals.org/>, and Epidemiology at <http://www.epidem.com/>). Information on the STROBE Initiative is available at <http://www.strobe-statement.org>.

# BMJ Open

## Comparison of three video laryngoscopes and direct laryngoscopy for emergency endotracheal intubation - a retrospective cohort study

|                                 |                                                                                                                                                                                                                                                                                                                                                                                                                                                 |
|---------------------------------|-------------------------------------------------------------------------------------------------------------------------------------------------------------------------------------------------------------------------------------------------------------------------------------------------------------------------------------------------------------------------------------------------------------------------------------------------|
| Journal:                        | <i>BMJ Open</i>                                                                                                                                                                                                                                                                                                                                                                                                                                 |
| Manuscript ID                   | bmjopen-2018-024927.R1                                                                                                                                                                                                                                                                                                                                                                                                                          |
| Article Type:                   | Research                                                                                                                                                                                                                                                                                                                                                                                                                                        |
| Date Submitted by the Author:   | 03-Dec-2018                                                                                                                                                                                                                                                                                                                                                                                                                                     |
| Complete List of Authors:       | Suzuki, Kei; Hiroshima University, Department of Emergency and Critical Care Medicine, Graduate School of Biomedical Sciences<br>Kusunoki, Shinji; Hiroshima Prefectural Hospital, Critical Care Medical Center<br>Tanigawa, Koichi ; Fukushima Medical University, Fukushima Global Medical Science Center<br>Shime, Nobuaki; Hiroshima University, Department of Emergency and Critical Care Medicine, Graduate School of Biomedical Sciences |
| <b>Primary Subject Heading</b>: | Emergency medicine                                                                                                                                                                                                                                                                                                                                                                                                                              |
| Secondary Subject Heading:      | Emergency medicine                                                                                                                                                                                                                                                                                                                                                                                                                              |
| Keywords:                       | Emergency intubation, tracheal intubation, laryngoscopy, video-assisted laryngoscopy, video laryngoscope, video laryngoscopy                                                                                                                                                                                                                                                                                                                    |
|                                 |                                                                                                                                                                                                                                                                                                                                                                                                                                                 |

SCHOLARONE™  
Manuscripts

*Original articles*

**Comparison of three video laryngoscopes and direct laryngoscopy for  
emergency endotracheal intubation - a retrospective cohort study**

Kei SUZUKI<sup>1</sup>, M.D., Shinji KUSUNOKI<sup>2</sup>, M.D., Ph.D., Koichi TANIGAWA<sup>3</sup>, M.D., Ph.D.,

Nobuaki SHIME<sup>1</sup>, M.D., Ph.D.

**From**

<sup>1</sup>Department of Emergency and Critical Care Medicine, Graduate School of Biomedical Sciences, Hiroshima University, Hiroshima, Japan

<sup>2</sup>Critical Care Medical Center, Hiroshima Prefectural Hospital, Hiroshima, Japan

<sup>3</sup>Fukushima Global Medical Science Center, Fukushima Medical University, Fukushima, Japan

**E-mail addresses:**

Kei Suzuki: [suzukik@hiroshima-u.ac.jp](mailto:suzukik@hiroshima-u.ac.jp)

Shinji Kusunoki: [kusunokish@gmail.com](mailto:kusunokish@gmail.com)

Koichi Tanigawa: [tanigawa@fmu.ac.jp](mailto:tanigawa@fmu.ac.jp)

Nobuaki Shime: [nshime@hiroshima-u.ac.jp](mailto:nshime@hiroshima-u.ac.jp)

**Corresponding author**

Nobuaki Shime, MD, PhD

Professor & Chief, Department of Emergency and Critical Care Medicine

Graduate School of Biomedical Sciences, Hiroshima University

1-2-3 Kasumi, Minami-ku,

Hiroshima 734-8551, Japan

Phone: +81-82-257-5456 Fax: +81-82-257-5589

e-mail: [nshime@hiroshima-u.ac.jp](mailto:nshime@hiroshima-u.ac.jp)

## Abstract

**Objective:** Video laryngoscopes are used for the management of difficult airways. This study compared the performances of three video laryngoscopes (Pentax-Airway Scope™ [Pentax], King Vision® [King], and McGrath® MAC [McGrath]) with the Macintosh direct laryngoscope [Macintosh] as reference in emergency tracheal intubations (TIs) to identify the optimal video laryngoscopes among them.

**Setting:** The emergency department and the intensive care unit of two tertiary-level hospitals in Japan.

**Participants:** All consecutive video-recorded cases of emergency TI in emergency departments and intensive care units between December 2013 and June 2015.

**Outcomes:** The primary study endpoint was first-pass intubation success. A subgroup analysis examined the first-pass intubation success of expert versus non-expert operators. A logistic regression analysis was performed to identify the predictors of first-pass success.

**Results:** A total of 287 emergency TIs were included. The first-pass intubation success rates were 78%, 58%, 78%, and 58% for the Pentax, King, McGrath, and Macintosh instruments, respectively (P=0.004). In post hoc analysis, the success rates of the Pentax and McGrath instruments were significantly higher than those of the King and Macintosh instruments. The success rates of non-expert operators were significantly higher (P=0.00004) for the Pentax

1  
2  
3  
4 (87%) and McGrath (78%) instruments than those with the King (50%) and Macintosh (46%)  
5  
6  
7 instruments but not when used by experts (67% with Pentax vs. 67% with McGrath vs. 78%  
8  
9  
10 with King vs. 78% with Macintosh,  $P=0.556$ ). After adjusting for TI indications, difficult  
11  
12  
13 airway characteristics, and expert versus non-expert operator parameters, the odds for a  
14  
15  
16  
17  
18 5 first-pass intubation success were significantly higher with the Pentax (odds ratio = 3.422,  
19  
20  
21 95% confidence interval 1.551-7.550;  $P=0.002$ ) and McGrath (3.758, 1.640-8.612;  $P=0.002$ )  
22  
23  
24 instruments.  
25

26  
27  
28 **Conclusion:** The Pentax and McGrath laryngoscopes were associated with significantly  
29  
30  
31 higher first-pass success rates in emergency TI than those for the King and Macintosh  
32  
33  
34 10 laryngoscopes, especially for non-expert operators.  
35  
36

37  
38 **Trial registration:** UMIN000027925  
39  
40  
41  
42  
43

44  
45 **Keywords:** Emergency intubation, tracheal intubation, laryngoscopy, video-assisted  
46  
47  
48 laryngoscopy, video laryngoscope, video laryngoscopy  
49  
50  
51  
52  
53  
54  
55  
56  
57  
58  
59  
60

15

1  
2  
3  
4 Strengths and limitations of this study  
5  
6  
7

8 • To our knowledge, this study is the first to directly compare three different video  
9  
10 laryngoscopes (Pentax-Airway Scope™, King Vision®, McGrath™ MAC) and the  
11  
12 Macintosh laryngoscope for emergency TI.  
13  
14  
15

16  
17  
18 5 • The strength of this study is that we precisely evaluated the intubation process among  
19  
20 four laryngoscopes using real-world video records of TI.  
21  
22

23  
24 • The major limitation of this study is its observational design. Although we tried to adjust  
25  
26 for almost all possible confounding factors based on previous studies, we could not  
27  
28 completely exclude the influence of other confounding factors on the results.  
29  
30  
31  
32  
33  
34  
35  
36  
37  
38  
39  
40  
41  
42  
43  
44  
45  
46  
47  
48  
49  
50  
51  
52  
53  
54  
55  
56  
57  
58  
59  
60

## Background

Tracheal intubation (TI) performed in the emergency setting is more challenging than when attempted in an operating room due to patient, operator, and environment-associated factors [1-3]. Consequently, the success rate is lower, the time needed to undertake the TI is longer, and the complication rate is higher [1, 2, 4, 5].

Video laryngoscopes (VLs) are increasingly used to increase the safety and success rates of emergency TIs. The VLs used in clinical practice include the Pentax-Airway Scope™ (Pentax), the King Vision® (King), and the McGrath™ MAC (McGrath). VLs are classified according to the guidance method of the tracheal tube. The Pentax and King VLs are L-shaped, with an attachment of the tracheal tube to the blade, while McGrath has no attachment, which facilitates the flexible orientation of the tube. Compared to the Macintosh laryngoscope (Macintosh), the superiority of VLs in viewing the glottis and in successfully completing TIs has been confirmed in a manikin model [6] and in patients undergoing elective surgery [7-10]. However, a randomized trial in intensive care units (ICUs) showed no difference in first-pass intubation success rates between VLs and the Macintosh system [11]. A systematic review of emergency TIs in emergency departments (EDs) and ICUs showed that the use of VLs had no significant advantage with regards to first-attempt success

1  
2  
3  
4 rates, although their use was significantly associated with a lower number of intubation  
5  
6  
7 attempts [12]. However, these studies included various types of VL in a single group and did  
8  
9  
10 not consider the characteristics of each VL. To our knowledge, no study has examined the  
11  
12  
13 relative performance of VLs, especially in emergency TIs.  
14  
15  
16

17  
18 5 The identification of the optimal VL is important, in view of a) the high rate of  
19  
20 difficult emergency TIs (10% in the non-operative area including the ED and the ICU) and  
21  
22 multiple intubation attempts (11% in the ED) [1, 13] and b) the increased incidence of  
23  
24 adverse events associated with unsuccessful attempts, in which more than one attempt at TI  
25  
26  
27 was a significant predictor of one or more adverse events (adjusted odds ratio= 7.5, 95%  
28  
29  
30  
31  
32  
33  
34 10 confidence interval [CI] = 5.9 to 9.6)). [14].  
35  
36

37  
38 The aim of this study was to identify the optimal VL among the Pentax, King, and  
39  
40 McGrath systems when compared to the Macintosh for the emergency performance of TI in  
41  
42  
43  
44 the ED or ICU.  
45  
46  
47  
48  
49  
50  
51  
52  
53  
54  
55  
56  
57  
58  
59  
60



## Methods

### Study design and setting

This retrospective, observational study was conducted at a university hospital and at a general, public hospital. This study was reviewed and approved by the research ethics committee of Hiroshima University and Hiroshima Prefectural Hospital (Nos. 1069 and 2013-76, respectively). Both boards waived the need to obtain patient informed consent before collecting the data. We disclosed information regarding this study on a webpage and offered an opportunity to opt out.

The ICUs of both institutions treat ambulatory and postoperative, medical and surgical, and pediatric and adult patients. The physicians were responsible for primary care in the ED and for critical care in the ICU. Both were staffed by board-certified attending physicians in emergency or intensive care medicine, or by anesthesiologists, and by post-graduate residents (years 3-7) in emergency medicine, anesthesiology, and internal medicine. In addition, transitional post-graduate residents (years 1 and 2) rotated for several months in the EDs and ICUs. Most of the transitional year residents completed  $\geq 1$  month of training in anesthesiology in the operating room, during which they performed TI, using Macintosh in patients undergoing general anesthesia, under the supervision of attending

1  
2  
3  
4 anesthesiologists. When difficult airways or cervical instability were anticipated, the choice  
5  
6  
7 of VL was left to the discretion of the supervisors.  
8  
9

10  
11 Three VLs, including the Pentax (Pentax-Airway Scope™; AWS-S100, HOYA  
12  
13 Corporation, Tokyo, Japan), King, (King Vision®, King Systems, Noblesville, IN) and  
14  
15 5 McGrath (McGrath™ MAC; 300-000-000, Medtronic Inc, Minneapolis, MN) systems, as  
16  
17 well as a Macintosh laryngoscope (Macintosh blade, KARL STORZ SE & Co, Tuttingen,  
18  
19 Germany) as a reference standard, were available in this study. These VL had been  
20  
21 commonly used prior to this study for several years in both institutions and there was no  
22  
23 specific off-the-job training for these VLs. Channeled disposable blades were used with the  
24  
25 King system. The laryngoscopes, drugs, or operators for the TI procedures were chosen by  
26  
27 the attending physician(s) without protocol. Using a hand-held or fixed camera, the  
28  
29 procedures were systematically video-recorded for archival and quality control.  
30  
31  
32  
33  
34  
35  
36  
37  
38  
39  
40  
41  
42  
43  
44  
45  
46  
47

### 48 **Study participants**

49  
50  
51 15 We included consecutive video-recorded cases of emergency TI performed in the ED and  
52  
53 ICU of both institutions between December 2013 and June 2015.  
54  
55  
56  
57  
58  
59  
60

## Data collection and measurements

We recorded the patient demographic and clinical characteristics; location of the TI (ED or ICU); indications for TI (cardiopulmonary arrest, airway obstruction, respiratory failure, hemodynamic instability, or altered mental status); drugs used for TI (sedatives, analgesics, and muscle relaxants); pre-procedurally defined complicating airway characteristics including obesity (body mass index  $\geq 28$  kg/m<sup>2</sup>), limited mouth opening (inter-incisor distance  $< 4$  cm), restricted neck mobilization, short neck (thyromental distance  $< 6$  cm), facial trauma (diagnosed clinically and by imaging), edema of the glottis visualized by the operator, and the presence of blood, secretions, or vomitus in the airways requiring suction or interfering with the procedure. The laryngoscopes used, the length of clinical experience, and the specialty of the operators were recorded. The subjective difficulty, using a visual analogue scale between 0 (easy) and 100 (difficult) was scored by the operators. The first-pass intubation success rate, the number of attempts until successful TI, changes of laryngoscopes and operators, time between laryngoscope insertion into the mouth and the onset of ventilation after TI, complications (edema or spasm of the glottis, dental injuries, regurgitation, and airway hemorrhages), esophageal intubations, and the laryngoscope in use when the complication or the esophageal intubation occurred, were recorded. The data were

collected from the video recording for measurements of variables, in addition to medical records and a questionnaire. Data collection and analysis were performed by a single author (KS).

## 5 Study endpoints

The primary study endpoint was the first-pass intubation success rate, while the secondary endpoints were the time needed to perform the procedure, the subjective difficulty score, procedural complications, and esophageal intubation.

## 10 Sample size and statistical analysis

The estimated sample size was based on our own unpublished TI study performed by residents in patients undergoing elective surgery, in which the first-pass intubation success rates using the Macintosh and Pentax instruments were 64% and 90%, respectively.

Assuming a 20% difference in first-pass intubation success rates between the two

15 laryngoscopes, we calculated a sample size of 62 procedures in each group at the 5%  $\alpha$  level and a power ( $1-\beta$ ) of 80%. Including missing data, we set the sample sizes of each group at 70 and a total of 280 procedures.

1  
2  
3  
4 Categorical variables are expressed as counts and percentages and continuous variables  
5  
6  
7  
8 as means  $\pm$  standard deviations. We compared the outcomes among the four laryngoscopes by  
9  
10  
11 Fisher's exact or Kruskal-Wallis tests. Procedures without an accurate measurement of the time  
12  
13  
14 needed to perform the TI from the video recording as well as those without subjective  
15  
16  
17 5 difficulty scores were excluded from the analysis. A *post hoc* analysis was performed by  
18  
19  
20 comparing all laryngoscopes pairwise to each other using Tukey's test. We also examined  
21  
22  
23 whether the first-pass intubation success rates differed among the four laryngoscopes, in each  
24  
25  
26 prespecified subgroup, according to the duration of clinical experience (1<sup>st</sup> and 2<sup>nd</sup>  
27  
28 post-graduate years as non-expert operators and  $\geq 3^{\text{rd}}$  post-graduate year as experts). A logistic  
29  
30  
31 10 regression analysis was performed to identify factors influencing the first-pass intubation  
32  
33  
34 success rate. We included possible confounding factors that differed significantly among the  
35  
36  
37 four laryngoscopes (indication for TI and restricted neck mobility) and which were identified  
38  
39  
40 in previous studies (limited mouth aperture,[15] blood, secretion or vomitus in the airways,[16]  
41  
42  
43 experts versus non-expert operator[17]). P-values  $<0.05$  were considered statistically  
44  
45  
46  
47  
48  
49  
50  
51 15 significant. The analyses were performed using IBM SPSS Statistics for Mac, version 23.0  
52  
53  
54 (IBM Corporation, Armonk, NY).  
55  
56  
57  
58  
59  
60

## Results

### Characteristics of the study population

The patient characteristics are summarized in Table 1. A total of 287 patients underwent video-recorded emergency TI. Among the indications for TI, hemodynamic instability differed significantly among the four laryngoscopes, with the McGrath most frequently used in the presence of hemodynamic instability. Complicating airway characteristics were present in 56% of cases, including blood, secretions, or vomitus in the airways in 123 procedures (43%). The Pentax was often used during procedures complicated by restricted neck mobility. Among the 67 non-experts, 57 operators (89.1%) had received some anesthesiology training in the operating room. They performed  $33 \pm 14$  TIs, including  $6 \pm 5$  procedures using Pentax or McGrath VLs. TI was interrupted in three cases (1%), of which one was managed without TI; another underwent emergency cricothyroidotomy and a third suffered fatal cardiopulmonary arrest. In the remaining 284 procedures, TI was attempted once in 199 (69%), twice in 49 (17%), and >twice in 36 instances (13%). The number of attempts until successful TI were  $1.3 \pm 0.9$  with Pentax,  $1.4 \pm 0.7$  with King,  $1.3 \pm 0.6$  with McGrath, and  $1.5 \pm 0.7$  with Macintosh ( $P=0.007$ ). The laryngoscope was replaced in 22 cases (8%). Out of 59 procedures, the King was replaced by another laryngoscope in nine instances (15%;  $P=0.043$  vs. other groups).

1  
2  
3  
4 The King was replaced by another device in seven procedures because of separation of the  
5  
6  
7 laryngoscope from its disposable blade. The operator was replaced in 21 attempts at TI (7%),  
8  
9  
10 of which 19 were initially made by a non-expert operator. The number of operators were  
11  
12  
13  
14 similarly replaced in the four study groups.  
15  
16  
17

5

### 21 **Main results**

22  
23  
24 The overall first-pass intubation success rate was 69% and differed significantly (P=0.004)  
25  
26  
27 among the four laryngoscopes (table 2). In *post hoc* analysis, the first-pass intubation success  
28  
29  
30 rates were higher for the Pentax and McGrath than those with the King or Macintosh  
31  
32  
33  
34 10 laryngoscopes, respectively, although the difference was significant only in the subgroup of  
35  
36  
37 non-expert operators (Table 2). The first-pass intubation success rates were similar in  
38  
39  
40 non-experts and experts. Logistic regression analysis with adjustments for the indication for  
41  
42  
43 TI, restricted neck mobilization, limited mouth opening, blood/secretion/vomitus in the  
44  
45  
46  
47 airway, and experts/non-expert revealed that the odds ratios for first-pass intubation success  
48  
49  
50  
51 15 were significantly higher for the Pentax and McGrath laryngoscopes (Table 3).  
52  
53

54 There were significant differences in the times needed to perform TI among the  
55  
56  
57 four laryngoscopes, although no differences were observed in pairwise comparisons of the  
58  
59  
60

1  
2  
3  
4 laryngoscopes in the *post hoc* analysis. There was a significant difference in the difficulty  
5  
6  
7 scores among the four laryngoscopes, with the McGrath significantly easier to use than the  
8  
9  
10  
11 Macintosh in *post hoc* analysis (Table 4).  
12  
13

14  
15  
16  
17  
18 5 TI complications occurred in 21 procedures (7%), consisting of one dental trauma,  
19  
20 seven spasms or edemas of the glottis, five instances of regurgitation, and 10 hemorrhages,  
21  
22 although there were no significant differences among the four laryngoscopes. The esophagus  
23  
24  
25 was intubated in three instances (1.2%) by non-experts using the Macintosh.  
26  
27  
28  
29  
30  
31  
32  
33  
34  
35  
36  
37  
38  
39  
40  
41  
42  
43  
44  
45  
46  
47  
48  
49  
50  
51  
52  
53  
54  
55  
56  
57  
58  
59  
60



## Discussion

In this retrospective, observational, two-center study, the first-pass success rates for emergency TI were significantly higher for Pentax or McGrath laryngoscopes than for King or Macintosh laryngoscopes when performed by non-expert operators. After adjusting for confounding factors, the odds ratios for first-pass intubation success were significantly higher for the Pentax and McGrath laryngoscopes. The use of the McGrath was associated with a lower subjective difficulty of performing TI than that for the use of the Macintosh.

A previous study of VLs for TI by experienced anesthetists in the operating room revealed a better visualization of the glottis with the Pentax than that with the Macintosh, while the success rates and TI procedure times were similar [8]. Moreover, studies with inexperienced residents reported a 96% first-pass success rate with the Pentax versus 70% with the Macintosh and 44 and 71 sec, respectively, to secure the airways [9]. Our results are concordant with these success rates, suggesting the advantageous characteristics of the Pentax, particularly for novice operators. The suitable shape of the PBLADE<sup>®</sup>, which indirectly visualizes the glottis regardless of the head and neck position, the existence of a blade channel to set the tracheal tube, and the guiding function of the target mark on the screen support the preferential use of the Pentax among the VLs [18].

1  
2  
3  
4 The McGrath is a relatively compact device without a tracheal tube guide channel  
5  
6  
7  
8 [19]. Like the Macintosh, it offers an indirect view of the glottis by flexible manipulations of  
9  
10  
11 the laryngoscope and tracheal tube. Several factors, therefore, such as a restricted neck  
12  
13  
14 mobility or the operator's experience with TI, might influence the success rate of the Pentax  
15  
16  
17  
18 5 versus the McGrath. However, the first-pass intubation success rates were nearly the same  
19  
20  
21 between these VLs in this study population. A randomized study comparing the performance  
22  
23  
24 of Pentax versus McGrath in emergency TI is, therefore, warranted.  
25  
26  
27

28 To our knowledge, the present study was the first to compare the Pentax and King  
29  
30 in clinical settings. Although they have similar shapes and tracheal tube guiding  
31  
32  
33  
34 10 characteristics, the first-pass intubation success rate was significantly lower for the King than  
35  
36  
37 that for the Pentax. The orientation of the King tracheal tube is relatively downward  
38  
39  
40 compared to that of the Pentax, which may interfere with its advancement. In addition, the  
41  
42  
43  
44 King has no marking to help in the placement of the tube. System malfunction, which  
45  
46  
47  
48 occurred in seven patients in this study, may also have lowered the success rate of the King.  
49  
50

51 15 Several factors, which varied among the four laryngoscopes, had repercussions on the  
52  
53  
54 success rate of TI. Blood or vomitus in the airways, an important complication when  
55  
56  
57  
58 performing emergency TI, may lower the image quality. Blood, secretions, or vomitus were  
59  
60

1  
2  
3  
4 present in the airways in 43% of procedures, significantly lowering the first-pass intubation  
5  
6  
7 success rate [16]. However, after adjusting for this factor, multiple variable analysis  
8  
9  
10 confirmed the advantage of the Pentax and McGrath. A limited mouth aperture was also  
11  
12  
13 correlated with the difficulty of TI [15]. This, however, was problematic in only 6% of cases  
14  
15  
16  
17  
18 5 and did not represent a major obstacle to the insertion of the devices.  
19  
20

21 The results of the present study suggest the usefulness of the Pentax or McGrath VLs  
22  
23 for emergency TI performed by novice physicians. However, the generalizability of the  
24  
25 results for intubation in other settings (in the operating theater or prehospital settings, or by  
26  
27 non-physicians) remains uncertain.  
28  
29  
30  
31  
32  
33

10

### 34 35 36 37 **Study limitations**

38  
39  
40 This was an observational study, in which confounding factors may have influenced the  
41  
42 success rate of TI and biased the results. However, after adjusting for possible confounding  
43  
44 factors based on those reported in previous studies, we observed a significant relationship  
45  
46  
47  
48  
49  
50  
51 15 between VLs and first-pass intubation success rates. We included video-recorded cases of TI  
52  
53 during the study period. Unfortunately, only 22% of cases were recorded due to the limited  
54  
55 availability of physicians who were able to operate the video cameras. Thus, there might be a  
56  
57  
58  
59  
60

1  
2  
3  
4 selection bias. The data collection and analysis were performed by a single author (KS),  
5  
6  
7 leaving the potential for observer bias. Furthermore, we classified the "non-experts" based on  
8  
9  
10 their clinical experience. A precise index to grade the level of intubation skill might have  
11  
12  
13 been preferable, although it does not currently exist. Finally, bias based on operator  
14  
15  
16 familiarity with each laryngoscope cannot be excluded. However, given the scarce overall  
17  
18 5 experience of TI itself prior to this study (4.6 times/person), the results of the non-expert  
19  
20  
21 experience of TI itself prior to this study (4.6 times/person), the results of the non-expert  
22  
23  
24 group are likely to be less biased.  
25  
26  
27  
28  
29  
30  
31  
32  
33  
34  
35  
36  
37  
38  
39  
40  
41  
42  
43  
44  
45  
46  
47  
48  
49  
50  
51  
52  
53  
54  
55  
56  
57  
58  
59  
60

## Conclusion

When performing emergency TI in the ED or the ICU, the use of the Pentax and McGrath laryngoscopes was associated with significantly higher first-pass intubation success rates, especially when operated by non-experts.

5

For peer review only

## List of Abbreviations

|           |                        |
|-----------|------------------------|
| TI        | tracheal intubation    |
| VL        | video laryngoscope     |
| Pentax    | Pentax-Airway Scope™   |
| 5 King    | King Vision®           |
| McGrath   | McGrath® MAC           |
| Macintosh | Macintosh laryngoscope |
| ICU       | intensive care unit    |
| ED        | emergency department   |

10

## Declarations

**Acknowledgements:** We thank the attending physicians and residents of the Department of Emergency and Critical Care Medicine of Hiroshima University and the Critical Care Medical Center of Hiroshima Prefectural Hospital who contributed to the data collection.

**Contributions:** Suzuki conceived the study, designed the trial, and collected and managed the data. Kusunoki, Tanigawa, and Shime supervised the conduct of the trial and data collection. Suzuki drafted the manuscript, and all authors contributed substantially to its revision. Suzuki takes responsibility for the paper as a whole.

**Funding:** This work was supported by KAKENHI Grants from the Japan Society for the Promotion of Science (JSPS) (Numbers JP 17K11573).

**Competing interests:** The authors declare that they have no competing interests.

2.

1  
2  
3  
4 **Ethics approval and consent to participate:** This study was reviewed and approved by the  
5  
6  
7 research ethics committees of Hiroshima University (No.1069) and Hiroshima Prefectural  
8  
9  
10 Hospital (No.2013-76).  
11  
12  
13  
14  
15  
16

17  
18 5 **Trial registration number:** University Hospital Medical Information Network  
19  
20  
21 Clinical Trials Registry (UMIN000027925,  
22  
23  
24 [https://upload.umin.ac.jp/cgi-open-bin/ctr\\_e/ctr\\_view.cgi?recptno=R000016182](https://upload.umin.ac.jp/cgi-open-bin/ctr_e/ctr_view.cgi?recptno=R000016182)); date of  
25  
26  
27 registration 26.06.2017 (retrospectively registered)  
28  
29  
30  
31  
32  
33

34 10 **Consent for publication:** Not applicable.  
35  
36  
37  
38  
39  
40

41 **Data sharing statement:** No additional data available.  
42  
43  
44  
45  
46  
47

48 **Patient and Public Involvement statement:** Patients were not involved.  
49  
50  
51 15  
52  
53  
54  
55  
56  
57  
58  
59  
60



## References

1. Martin LD, Mhyre JM, Shanks AM, *et al.* 3,423 emergency tracheal intubations at a university hospital: airway outcomes and complications. *Anesthesiology* 2011;114:42-48.
- 5 2. Schmidt UH, Kumwilaisak K, Bittner E, *et al.* Effects of supervision by attending anesthesiologists on complications of emergency tracheal intubation. *Anesthesiology* 2008;109:973-977.
3. Benedetto WJ, Hess DR, Gettings E, *et al.* Urgent tracheal intubation in general hospital units: an observational study. *J Clin Anesth.* 2007;19:20-24.
- 10 4. Schwartz DE, Matthay MA, Cohen NH. Death and other complications of emergency airway management in critically ill adults. A prospective investigation of 297 tracheal intubations. *Anesthesiology* 1995;82:367-376.
- 5 15 5. Simpson GD, Ross MJ, McKeown DW, *et al.* Tracheal intubation in the critically ill: a multi-centre national study of practice and complications. *Br J Anaesth.* 2012;108:792-799.
6. Liu L, Tanigawa K, Kusunoki S, *et al.* Tracheal intubation of a difficult airway using Airway Scope, Airtraq, and Macintosh laryngoscope: a comparative manikin study of

- 1  
2  
3  
4 inexperienced personnel. *Anesth Analg*. 2010;110:1049-1055.  
5  
6  
7  
8 7. Carlson JN, Brown CA. Does the use of video laryngoscopy improve intubation  
9  
10 outcomes? *Ann Emerg Med*. 2014;64:165-166.  
11  
12  
13  
14 8. Teoh WH, Saxena S, Shah MK, *et al*. Comparison of three videolaryngoscopes:  
15  
16  
17 5 Pentax Airway Scope, C-MAC, Glidescope vs the MacIntosh laryngoscope for  
18  
19 tracheal intubation. *Anaesthesia* 2010;65:1126-1132.  
20  
21  
22  
23  
24 9. Hirabayashi Y, Seo N. Tracheal intubation by non-anaesthetist physicians using the  
25  
26  
27 Airway Scope. *Emerg Med J*. 2007;24:572-573.  
28  
29  
30  
31 10. Taylor AM, Peck M, Launcelott S, *et al*. The McGrath® Series 5 videolaryngoscope  
32  
33  
34 10 vs the Macintosh laryngoscope: a randomised, controlled trial in patients with a  
35  
36  
37 simulated difficult airway. *Anaesthesia* 2013;68:142-147.  
38  
39  
40  
41 11. Janz DR, Semler MW, Lentz RJ, *et al*. Randomized Trial of Video Laryngoscopy for  
42  
43  
44 Endotracheal Intubation of Critically Ill Adults. *Crit Care Med*. 2016;44:1980-1987.  
45  
46  
47  
48 12. Rombey T, Schieren M, Pieper D. Video versus direct laryngoscopy for inpatient  
49  
50  
51 15 emergency intubation in adults: a systematic review and meta-analysis of randomized  
52  
53  
54 controlled trials. *Dtsch Arztebl Int*. 2018;115:437-444.  
55  
56  
57  
58 13. Hasegawa K, Shigemitsu K, Hagiwara Y, *et al*. Association between repeated  
59  
60

- 1  
2  
3  
4 intubation attempts and adverse events in emergency departments: An analysis of a  
5  
6  
7 multicenter prospective observational study. *Ann Emerg Med.* 2012;60:749-754.e2.  
8  
9  
10  
11 14. Sakles JC, Chiu S, Mosier J, *et al.* The importance of first pass success when  
12  
13  
14 performing orotracheal intubation in the emergency department. *Acad Emerg Med.*  
15  
16  
17 2013;20:71-78.  
18 5  
19  
20  
21 15. Breckwoldt J, Klemstein S, Brunne B, *et al.* Difficult prehospital endotracheal  
22  
23  
24 intubation - predisposing factors in a physician based EMS. *Resuscitation*  
25  
26  
27 2011;82:1519-1524.  
28  
29  
30  
31 16. Gaither JB, Spaite DW, Stolz U, *et al.* Prevalence of difficult airway predictors in  
32  
33  
34 10 cases of failed prehospital endotracheal intubation. *J Emerg Med* 2014;47(3):294-300.  
35  
36  
37  
38 17. Crewdson K, Lockey DJ, Røislien J, *et al.* The success of pre-hospital tracheal  
39  
40  
41 intubation by different pre-hospital providers: a systematic literature review and  
42  
43  
44 meta-analysis. *Crit Care* 2017;21:31.  
45  
46  
47  
48 18. Koyama J, Aoyama T, Kusano Y, *et al.* Description and first clinical application of  
49  
50  
51 15 AirWay Scope for tracheal intubation. *J Neurosurg Anesth.* 2006;18:247-250.  
52  
53  
54  
55 19. Kotera A, Irie H, Iwashita S, *et al.* Comparison of the McGrath MAC video  
56  
57  
58 laryngoscope and the Pentax Airwayscope during chest compression: a manikin study.  
59  
60

*J Intensive Care* 2014;2:18.

For peer review only

1  
2  
3  
4  
5  
6  
7  
8  
9  
10  
11  
12  
13  
14  
15  
16  
17  
18  
19  
20  
21  
22  
23  
24  
25  
26  
27  
28  
29  
30  
31  
32  
33  
34  
35  
36  
37  
38  
39  
40  
41  
42  
43  
44  
45  
46  
47  
48  
49  
50  
51  
52  
53  
54  
55  
56  
57  
58  
59  
60

**Table 1. Baseline and difficult airway characteristics**

|                                                     | All<br>(n=287)        | Pentax-Airway Scope<br>(n=82) | King VISION<br>(n=59) | McGrath Mac<br>(n=82) | Macintosh<br>(n=64) | P     |
|-----------------------------------------------------|-----------------------|-------------------------------|-----------------------|-----------------------|---------------------|-------|
| Men                                                 | 165 (57.5)            | 54 (65.9)                     | 31 (52.5)             | 51 (62.2)             | 29 (45.3)           | 0.057 |
| Age, years                                          | 65.4±20.5             | 60.7±24.8                     | 69.0±16.2             | 67.4±17.1             | 65.7±21.4           | 0.457 |
| Height, cm                                          | 158.1±14.4            | 156.9±19.3                    | 159.3±9.0             | 160.9±10.2            | 154.9±14.9          | 0.044 |
| Weight, kg                                          | 55.9±13.9             | 56.3±16.9                     | 56.2±10.2             | 56.7±11.9             | 54.0±15.2           | 0.400 |
| Body mass index                                     | 22.0±3.7              | 22.3±3.8                      | 22.1±3.6              | 21.7±3.2              | 22.1±4.2            | 0.794 |
| Expert operators                                    | 131 (45.6)            | 36 (43.9)                     | 27 (45.8)             | 45 (54.9)             | 23 (35.9)           | 0.149 |
| Location of tracheal intubation (ED/ICU)            | 162 (56.4)/125 (43.6) | 49 (59.8)/33 (40.2)           | 37 (62.7)/22 (37.3)   | 37 (45.1)/45 (54.9)   | 39 (60.9)/25 (39.1) | 0.111 |
| Indications for tracheal intubation                 |                       |                               |                       |                       |                     |       |
| Cardiopulmonary arrest                              | 114 (39.7)            | 34 (41.5)                     | 26 (44.1)             | 25 (30.5)             | 29 (45.3)           | 0.220 |
| Airway obstruction                                  | 14 (4.9)              | 4 (4.9)                       | 1 (1.7)               | 7 (8.5)               | 2 (3.1)             | 0.305 |
| Respiratory failure                                 | 45 (15.7)             | 12 (14.6)                     | 11 (18.6)             | 14 (17.1)             | 8 (12.5)            | 0.789 |
| Hemodynamic instability                             | 32 (11.1)             | 6 (7.3)                       | 2 (3.4)               | 20 (24.4)             | 4 (6.3)             | 0.000 |
| Altered mental status                               | 82 (28.6)             | 26 (31.7)                     | 19 (32.2)             | 16 (19.5)             | 21 (32.8)           | 0.182 |
| Drugs used for tracheal intubation                  |                       |                               |                       |                       |                     |       |
| None                                                | 148 (51.6)            | 44 (53.7)                     | 32 (54.2)             | 35 (42.7)             | 37 (57.8)           | 0.274 |
| Sedatives                                           | 116 (40.4)            | 33 (40.2)                     | 24 (40.7)             | 35 (42.7)             | 24 (37.5)           | 0.944 |
| Analgesics                                          | 91 (31.7)             | 22 (26.8)                     | 15 (25.4)             | 36 (43.9)             | 18 (28.1)           | 0.053 |
| Muscle relaxants                                    | 59 (20.6)             | 15 (18.3)                     | 10 (16.9)             | 22 (26.8)             | 12 (18.8)           | 0.450 |
| Drugs used for tracheal intubation in Non-CPA cases |                       |                               |                       |                       |                     |       |
| None                                                | 34 (19.7)             | 10 (20.8)                     | 6 (18.2)              | 10 (17.5)             | 8 (22.9)            | 0.925 |
| Sedatives                                           | 116 (67.1)            | 33 (68.8)                     | 24 (72.7)             | 35 (61.4)             | 24 (68.6)           | 0.722 |
| Analgesics                                          | 91 (52.6)             | 22 (45.8)                     | 15 (45.5)             | 36 (63.2)             | 18 (51.4)           | 0.250 |
| Muscle relaxants                                    | 59 (34.1)             | 15 (31.3)                     | 10 (30.3)             | 22 (38.6)             | 12 (34.3)           | 0.842 |
| Difficult airway characteristics                    |                       |                               |                       |                       |                     |       |
| Obesity                                             | 16 (5.6)              | 6 (7.3)                       | 3 (5.1)               | 3 (3.7)               | 4 (6.3)             | 0.793 |
| Limited mouth opening                               | 17 (5.9)              | 5 (6.1)                       | 5 (8.5)               | 6 (7.3)               | 1 (1.6)             | 0.319 |
| Restricted neck mobilization                        | 39 (13.6)             | 19 (23.2)                     | 6 (10.2)              | 7 (8.5)               | 7 (10.9)            | 0.040 |
| Short neck                                          | 9 (3.1)               | 3 (3.7)                       | 1 (1.7)               | 3 (3.7)               | 2 (3.1)             | 0.937 |
| Facial trauma                                       | 13 (4.5)              | 7 (8.5)                       | 1 (1.7)               | 4 (4.9)               | 1 (1.6)             | 0.171 |
| Edema of glottis                                    | 7 (2.4)               | 2 (2.4)                       | 0 (0.0)               | 4 (4.9)               | 1 (1.6)             | 0.390 |
| Bloods, secretion, or vomitus in airway             | 123 (42.9)            | 36 (43.9)                     | 23 (39.0)             | 38 (46.3)             | 26 (40.6)           | 0.821 |
| Cases with difficult airway characteristics         | 161 (56.1)            | 47 (57.3)                     | 31 (52.5)             | 48 (58.5)             | 35 (54.7)           | 0.897 |

Values are numbers (%) of observations or means  $\pm$  standard deviations. ED, emergency department; ICU, intensive care unit; CPA, cardiopulmonary arrest.

For peer review only

1  
2  
3  
4  
5  
6  
7  
8  
9  
10  
11  
12  
13  
14  
15  
16  
17  
18  
19  
20  
21  
22  
23  
24  
25  
26  
27  
28  
29  
30  
31  
32  
33  
34  
35  
36  
37  
38  
39  
40  
41  
42  
43  
44  
45  
46

**Table 2. First-pass intubation success rates of four laryngoscopes**

|                                      | All laryngoscopes | Pentax-Airway Scope | King VISION | McGrath Mac | Macintosh | P       |
|--------------------------------------|-------------------|---------------------|-------------|-------------|-----------|---------|
| All operators, n                     | 287               | 82                  | 59          | 82          | 64        |         |
| <b>First-pass intubation success</b> | 199 (69)          | 64 (78)*            | 34 (58)     | 64 (78)†    | 37 (58)   | 0.004   |
| Non-expert operators                 | 156               | 46                  | 32          | 37          | 41        |         |
| <b>First-pass intubation success</b> | 104 (67)          | 40 (87)‡            | 16 (50)     | 29 (78)§    | 19 (46)   | 0.00004 |
| Expert operators                     | 131               | 36                  | 27          | 45          | 23        |         |
| <b>First-pass intubation success</b> | 95 ( 73 )         | 24 (67)             | 18 (67)     | 35 (78)     | 18 (78)   | 0.556   |

Values are numbers (%) of observations; *post hoc* analyses were performed using Tukey's test for paired comparisons of four laryngoscopes .

\*:vs. King VISION P=0.043, \*:vs. Macintosh P=0.039, †:vs. King VISION P=0.043, †:vs. Macintosh P=0.039

‡:vs. King VISION P=0.002, ‡:vs. Macintosh P<0.001, §:vs. King VISION P=0.043, §:vs. Macintosh P=0.009

5

**Table 3. Multiple variable analysis of factors influencing the first-pass intubation success rates**

| Factors                                   | Odd ratios    | 95% confidence intervals | P     |
|-------------------------------------------|---------------|--------------------------|-------|
| Laryngoscopes                             |               |                          |       |
| Macintosh (reference)                     | 1             | -                        | -     |
| Pentax-Airway Scope                       | 3.422         | 1.551-7.550              | 0.002 |
| King VISION                               | 1.056         | 0.487-2.289              | 0.889 |
| McGrath Mac                               | 3.758         | 1.640-8.612              | 0.002 |
| Indications for tracheal intubation       |               |                          |       |
| Cardiopulmonary arrest                    | 1 (reference) |                          |       |
| Airway obstruction                        | 0.226         | 0.063-0.812              | 0.023 |
| Respiratory failure                       | 0.720         | 0.284-1.822              | 0.488 |
| Hemodynamic instability                   | 0.380         | 0.137-1.054              | 0.063 |
| Altered mental status                     | 0.361         | 0.180-0.723              | 0.004 |
| Difficult airway characteristics          |               |                          |       |
| Mouth opening                             |               |                          |       |
| Unlimited                                 | 1 (reference) | -                        | -     |
| Limited                                   | 0.092         | 0.026-0.323              | 0.000 |
| Neck mobility                             |               |                          |       |
| Unrestricted                              | 1 (reference) | -                        | -     |
| Restricted                                | 0.951         | 0.414-2.182              | 0.905 |
| Blood, secretions, vomitus in the airways |               |                          |       |
| Absent                                    | 1 (reference) | -                        | -     |
| Present                                   | 0.455         | 0.257-0.804              | 0.007 |
| Operators                                 |               |                          |       |
| Non-expert                                | 1 (reference) | -                        | -     |
| Expert                                    | 1.688         | 0.916-3.108              | 0.093 |



1  
2  
3  
4  
5  
6  
7  
8  
9  
10  
11  
12  
13  
14  
15  
16  
17  
18  
19  
20  
21  
22  
23  
24  
25  
26  
27  
28  
29  
30  
31  
32  
33  
34  
35  
36  
37  
38  
39  
40  
41  
42  
43  
44  
45  
46

For peer review only

3.

**Table 4. Comparisons of times needed to perform tracheal intubations and of difficulty scores for four different laryngoscopes**

|                                  | Overall       | Pentax-Airway Scope | King VISION  | McGrath Mac   | Macintosh    | P     |
|----------------------------------|---------------|---------------------|--------------|---------------|--------------|-------|
| Time to perform intubations, sec | 60±31 (n=269) | 63±34 (n=78)        | 63±31 (n=45) | 62±31 (n=79)  | 52±27 (n=67) | 0.043 |
| Difficulty score <sup>†</sup>    | 39±27 (n=258) | 39±26 (n=72)        | 43±26 (n=45) | 32±27* (n=78) | 45±26 (n=63) | 0.009 |

Values are means ± standard deviations; \*P=0.027 vs. Macintosh.

<sup>†</sup>Difficulty was scored by visual analogue scale, from very easy (0) to very difficult (100).

*post hoc* analyses were performed using Tukey's test for paired comparisons of 4 laryngoscopes.

5

For peer review only

STROBE Statement—Checklist of items that should be included in reports of *cohort studies*

|                           | Item No | Recommendation                                                                                                                                                                                    | Reported on page No |
|---------------------------|---------|---------------------------------------------------------------------------------------------------------------------------------------------------------------------------------------------------|---------------------|
| <b>Title and abstract</b> | 1       | (a) Indicate the study's design with a commonly used term in the title or the abstract                                                                                                            | 1, 2                |
|                           |         | (b) Provide in the abstract an informative and balanced summary of what was done and what was found                                                                                               | 2-3                 |
| <b>Introduction</b>       |         |                                                                                                                                                                                                   |                     |
| Background/rationale      | 2       | Explain the scientific background and rationale for the investigation being reported                                                                                                              | 4-5                 |
| Objectives                | 3       | State specific objectives, including any prespecified hypotheses                                                                                                                                  | 4-5                 |
| <b>Methods</b>            |         |                                                                                                                                                                                                   |                     |
| Study design              | 4       | Present key elements of study design early in the paper                                                                                                                                           | 6-8                 |
| Setting                   | 5       | Describe the setting, locations, and relevant dates, including periods of recruitment, exposure, follow-up, and data collection                                                                   | 6                   |
| Participants              | 6       | (a) Give the eligibility criteria, and the sources and methods of selection of participants. Describe methods of follow-up                                                                        | 7                   |
|                           |         | (b) For matched studies, give matching criteria and number of exposed and unexposed                                                                                                               |                     |
| Variables                 | 7       | Clearly define all outcomes, exposures, predictors, potential confounders, and effect modifiers. Give diagnostic criteria, if applicable                                                          | 7-8                 |
| Data sources/measurement  | 8*      | For each variable of interest, give sources of data and details of methods of assessment (measurement). Describe comparability of assessment methods if there is more than one group              | 7-8                 |
| Bias                      | 9       | Describe any efforts to address potential sources of bias                                                                                                                                         | 8                   |
| Study size                | 10      | Explain how the study size was arrived at                                                                                                                                                         | 9                   |
| Quantitative variables    | 11      | Explain how quantitative variables were handled in the analyses. If applicable, describe which groupings were chosen and why                                                                      | 7-8                 |
| Statistical methods       | 12      | (a) Describe all statistical methods, including those used to control for confounding                                                                                                             | 9-10                |
|                           |         | (b) Describe any methods used to examine subgroups and interactions                                                                                                                               | 9                   |
|                           |         | (c) Explain how missing data were addressed                                                                                                                                                       | 9                   |
|                           |         | (d) If applicable, explain how loss to follow-up was addressed                                                                                                                                    |                     |
|                           |         | (e) Describe any sensitivity analyses                                                                                                                                                             |                     |
| <b>Results</b>            |         |                                                                                                                                                                                                   |                     |
| Participants              | 13*     | (a) Report numbers of individuals at each stage of study—eg numbers potentially eligible, examined for eligibility, confirmed eligible, included in the study, completing follow-up, and analysed | 11                  |
|                           |         | (b) Give reasons for non-participation at each stage                                                                                                                                              |                     |
|                           |         | (c) Consider use of a flow diagram                                                                                                                                                                |                     |
| Descriptive data          | 14*     | (a) Give characteristics of study participants (eg demographic, clinical, social) and information on exposures and potential confounders                                                          | 25                  |
|                           |         | (b) Indicate number of participants with missing data for each                                                                                                                                    | 11                  |

|                          |     | variable of interest                                                                                                                                                                                         |           |
|--------------------------|-----|--------------------------------------------------------------------------------------------------------------------------------------------------------------------------------------------------------------|-----------|
|                          |     | (c) Summarise follow-up time (eg, average and total amount)                                                                                                                                                  |           |
| Outcome data             | 15* | Report numbers of outcome events or summary measures over time                                                                                                                                               | 12-13, 26 |
| Main results             | 16  | (a) Give unadjusted estimates and, if applicable, confounder-adjusted estimates and their precision (eg, 95% confidence interval). Make clear which confounders were adjusted for and why they were included | 26, 27    |
|                          |     | (b) Report category boundaries when continuous variables were categorized                                                                                                                                    |           |
|                          |     | (c) If relevant, consider translating estimates of relative risk into absolute risk for a meaningful time period                                                                                             |           |
| Other analyses           | 17  | Report other analyses done—eg analyses of subgroups and interactions, and sensitivity analyses                                                                                                               | 12, 26    |
| <b>Discussion</b>        |     |                                                                                                                                                                                                              |           |
| Key results              | 18  | Summarise key results with reference to study objectives                                                                                                                                                     | 14        |
| Limitations              | 19  | Discuss limitations of the study, taking into account sources of potential bias or imprecision. Discuss both direction and magnitude of any potential bias                                                   | 16        |
| Interpretation           | 20  | Give a cautious overall interpretation of results considering objectives, limitations, multiplicity of analyses, results from similar studies, and other relevant evidence                                   | 14        |
| Generalisability         | 21  | Discuss the generalisability (external validity) of the study results                                                                                                                                        | 16        |
| <b>Other information</b> |     |                                                                                                                                                                                                              |           |
| Funding                  | 22  | Give the source of funding and the role of the funders for the present study and, if applicable, for the original study on which the present article is based                                                | 20        |

\*Give information separately for exposed and unexposed groups.

**Note:** An Explanation and Elaboration article discusses each checklist item and gives methodological background and published examples of transparent reporting. The STROBE checklist is best used in conjunction with this article (freely available on the Web sites of PLoS Medicine at <http://www.plosmedicine.org/>, Annals of Internal Medicine at <http://www.annals.org/>, and Epidemiology at <http://www.epidem.com/>). Information on the STROBE Initiative is available at <http://www.strobe-statement.org>.

# BMJ Open

## Comparison of three video laryngoscopes and direct laryngoscopy for emergency endotracheal intubation - a retrospective cohort study

|                                 |                                                                                                                                                                                                                                                                                                                                                                                                                                                 |
|---------------------------------|-------------------------------------------------------------------------------------------------------------------------------------------------------------------------------------------------------------------------------------------------------------------------------------------------------------------------------------------------------------------------------------------------------------------------------------------------|
| Journal:                        | <i>BMJ Open</i>                                                                                                                                                                                                                                                                                                                                                                                                                                 |
| Manuscript ID                   | bmjopen-2018-024927.R2                                                                                                                                                                                                                                                                                                                                                                                                                          |
| Article Type:                   | Research                                                                                                                                                                                                                                                                                                                                                                                                                                        |
| Date Submitted by the Author:   | 17-Jan-2019                                                                                                                                                                                                                                                                                                                                                                                                                                     |
| Complete List of Authors:       | Suzuki, Kei; Hiroshima University, Department of Emergency and Critical Care Medicine, Graduate School of Biomedical Sciences<br>Kusunoki, Shinji; Hiroshima Prefectural Hospital, Critical Care Medical Center<br>Tanigawa, Koichi ; Fukushima Medical University, Fukushima Global Medical Science Center<br>Shime, Nobuaki; Hiroshima University, Department of Emergency and Critical Care Medicine, Graduate School of Biomedical Sciences |
| <b>Primary Subject Heading</b>: | Emergency medicine                                                                                                                                                                                                                                                                                                                                                                                                                              |
| Secondary Subject Heading:      | Emergency medicine                                                                                                                                                                                                                                                                                                                                                                                                                              |
| Keywords:                       | Emergency intubation, tracheal intubation, laryngoscopy, video-assisted laryngoscopy, video laryngoscope, video laryngoscopy                                                                                                                                                                                                                                                                                                                    |
|                                 |                                                                                                                                                                                                                                                                                                                                                                                                                                                 |

SCHOLARONE™  
Manuscripts

**Comparison of three video laryngoscopes and direct laryngoscopy for  
emergency endotracheal intubation - a retrospective cohort study**

Kei SUZUKI<sup>1</sup>, M.D., Shinji KUSUNOKI<sup>2</sup>, M.D., Ph.D., Koichi TANIGAWA<sup>3</sup>, M.D., Ph.D.,

Nobuaki SHIME<sup>1</sup>, M.D., Ph.D.

**From**

<sup>1</sup>Department of Emergency and Critical Care Medicine, Graduate School of Biomedical Sciences, Hiroshima University, Hiroshima, Japan

<sup>2</sup>Critical Care Medical Center, Hiroshima Prefectural Hospital, Hiroshima, Japan

<sup>3</sup>Fukushima Global Medical Science Center, Fukushima Medical University, Fukushima, Japan

**E-mail addresses:**

Kei Suzuki: suzukik@hiroshima-u.ac.jp

Shinji Kusunoki: kusunokish@gmail.com

Koichi Tanigawa: tanigawa@fmu.ac.jp

Nobuaki Shime: nshime@hiroshima-u.ac.jp

**Corresponding author**

Nobuaki Shime, MD, PhD

Professor & Chief, Department of Emergency and Critical Care Medicine

Graduate School of Biomedical Sciences, Hiroshima University

1-2-3 Kasumi, Minami-ku,

Hiroshima 734-8551, Japan

Phone: +81-82-257-5456 Fax: +81-82-257-5589

e-mail: nshime@hiroshima-u.ac.jp

## Abstract

**Objective:** Video laryngoscopes are used for managing difficult airways. This study compared three video laryngoscopes' (Pentax-Airway Scope™ [Pentax], King Vision® [King], and McGrath® MAC [McGrath]) performances with the Macintosh direct laryngoscope [Macintosh] as emergency tracheal intubations (TIs) reference.

**Design:** Retrospective cohort study.

**Setting:** The emergency department and the intensive care unit of two Japanese tertiary-level hospitals.

**Participants:** All consecutive video-recorded emergency TI cases in emergency departments and intensive care units between December 2013 and June 2015.

**Primary outcome measures:** The primary study endpoint was first-pass intubation success.

A subgroup analysis examined the first-pass intubation success of expert versus non-expert operators. A logistic regression analysis was performed to identify the predictors of first-pass intubation success.

**Results:** A total of 287 emergency TIs were included. The first-pass intubation success rates were 78%, 58%, 78%, and 58% for the Pentax, King, McGrath, and Macintosh instruments, respectively (P=0.004, Fisher's exact test). The non-expert operators' success rates were significantly higher (P=0.00004, Fisher's exact test) for the Pentax (87%) and McGrath

1  
2  
3  
4 (78%) instruments than that for the King (50%) and Macintosh (46%) instruments, unlike  
5  
6  
7 that of the experts (67%, 67%, 78%, and 78% for Pentax, McGrath, King and Macintosh,  
8  
9  
10 respectively;  $P=0.556$ , Fisher's exact test). After TI indication, difficult airway  
11  
12  
13 characteristics, and expert versus non-expert operator parameters adjustments, the Pentax  
14  
15  
16  
17 5 (odds ratio = 3.422, 95% confidence interval 1.551-7.550;  $P=0.002$ ) and McGrath (3.758,  
18  
19  
20 1.640-8.612;  $P=0.002$ ) instruments showed significantly higher first-pass intubation success  
21  
22  
23 odds when compared to the Macintosh laryngoscope (reference, odds ratio = 1). The King  
24  
25  
26  
27 instrument, however, (odds ratio = 1.056; 95% confidence interval 0.487-2.289,  $p = 0.889$ )  
28  
29  
30 failed to show any significant superiority.  
31  
32  
33

34 10 **Conclusion:** The Pentax and McGrath laryngoscopes showed significantly higher emergency  
35  
36  
37 TI first-pass intubation success rates than the King laryngoscope when compared to the  
38  
39  
40 Macintosh laryngoscope, especially for non-expert operators.  
41  
42  
43

44 **Trial registration:** UMIN000027925  
45  
46  
47  
48  
49  
50

51 15 **Keywords:** Emergency intubation, tracheal intubation, laryngoscopy, video-assisted  
52  
53  
54 laryngoscopy, video laryngoscope, video laryngoscopy  
55  
56  
57  
58  
59  
60



1  
2  
3  
4 Strengths and limitations of this study  
5  
6  
7

8 • To our knowledge, this study is the first to directly compare three different video  
9  
10 laryngoscopes (Pentax-Airway Scope™, King Vision®, McGrath™ MAC) and the  
11  
12 Macintosh laryngoscope for emergency TI.  
13  
14  
15

16  
17  
18 5 • The strength of this study is that we precisely evaluated the intubation process among  
19  
20 four laryngoscopes using real-world video records of TI.  
21  
22

23  
24 • The major limitation of this study is its observational design. Although we tried to adjust  
25  
26 for almost all possible confounding factors based on previous studies, we could not  
27  
28 completely exclude the influence of other confounding factors on the results.  
29  
30  
31  
32  
33  
34  
35  
36  
37  
38  
39  
40  
41  
42  
43  
44  
45  
46  
47  
48  
49  
50  
51  
52  
53  
54  
55  
56  
57  
58  
59  
60

## Background

Tracheal intubation (TI) performed in the emergency setting is more challenging than when attempted in an operating room due to patient, operator, and environment-associated factors [1-3]. Consequently, the success rate is lower, the time needed to undertake the TI is longer, and the complication rate is higher [1, 2, 4, 5].

Video laryngoscopes (VLs) are increasingly used to increase the safety and success rates of emergency TIs. Amongst others, the VLs used in clinical practice include the Pentax-Airway Scope™ (Pentax), the King Vision® (King), and the McGrath™ MAC (McGrath).

VLs are classified according to the guidance method of the tracheal tube. The Pentax and

King VLs are L-shaped, with an attachment of the tracheal tube to the blade, while McGrath

has no attachment, which facilitates the flexible orientation of the tube. Compared to the

Macintosh laryngoscope (Macintosh), the superiority of VLs in viewing the glottis and in

successfully completing TIs has been confirmed in a manikin model [6] and in patients

undergoing elective surgery [7-10]. However, a randomized trial in intensive care units

(ICUs) showed no difference in first-pass intubation success rates between VLs and the

Macintosh system [11]. A systematic review of emergency TIs in emergency departments

(EDs) and ICUs showed that the use of VLs had no significant advantage with regards to

1  
2  
3  
4 first-attempt success rates, although their use was significantly associated with a lower  
5  
6  
7 number of intubation attempts [12]. However, these studies included various types of VL in a  
8  
9  
10 single group and did not consider the characteristics of each VL. To our knowledge, no study  
11  
12  
13  
14 has examined the relative performance of VLs, especially in emergency TIs.  
15  
16

17  
18 5 The identification of the optimal VL is important, in view of a) the high rate of  
19  
20 difficult emergency TIs (10% in the non-operative area including the ED and the ICU) and  
21  
22 multiple intubation attempts (11% in the ED) [1, 13] and b) the increased incidence of  
23  
24 adverse events associated with unsuccessful attempts, in which more than one attempt at TI  
25  
26  
27 was a significant predictor of one or more adverse events (adjusted odds ratio= 7.5, 95%  
28  
29  
30  
31 confidence interval [CI] = 5.9 to 9.6)). [14].  
32  
33  
34 10  
35  
36

37  
38 The aim of this study was to compare the emergency TI performances of the Pentax,  
39  
40 King, and McGrath systems with that of the Macintosh in the ED or ICU.  
41  
42  
43  
44  
45  
46  
47  
48  
49  
50  
51  
52  
53  
54  
55  
56  
57  
58  
59  
60

## Methods

### Study design and setting

This retrospective, observational study was conducted at a university hospital and at a general, public hospital. This study was reviewed and approved by the research ethics committee of Hiroshima University and Hiroshima Prefectural Hospital (Nos. 1069 and 2013-76, respectively). Both boards waived the need to obtain patient informed consent before collecting the data. We disclosed information regarding this study on a webpage and offered an opportunity to opt out.

The ICUs of both institutions treat ambulatory and postoperative, medical, and surgical, and pediatric and adult patients. The physicians were responsible for primary care in the ED and for critical care in the ICU. Both were staffed by board-certified attending physicians in emergency or intensive care medicine, or by anesthesiologists, and by post-graduate residents (years 3-7) in emergency medicine, anesthesiology, and internal medicine. In addition, transitional post-graduate residents (years 1 and 2) rotated for several months in the EDs and ICUs. Most of the transitional year residents completed  $\geq 1$  month of training in anesthesiology in the operating room, during which they performed TI, using Macintosh in patients undergoing general anesthesia, under the supervision of attending anesthesiologists.

1  
2  
3  
4 When difficult airways or cervical instability were anticipated, the choice of VL was left to  
5  
6  
7 the discretion of the supervisors.  
8  
9

10  
11 Three VLs, including the Pentax (Pentax-Airway Scope™; AWS-S100, HOYA  
12  
13 Corporation, Tokyo, Japan), King, (King Vision®, King Systems, Noblesville, IN) and  
14  
15  
16  
17  
18 5 McGrath (McGrath™ MAC; 300-000-000, Medtronic Inc, Minneapolis, MN) systems, as  
19  
20 well as a Macintosh laryngoscope (Macintosh blade, KARL STORZ SE & Co, Tuttingen,  
21  
22 Germany) as a reference standard, were available in this study. These VL had been  
23  
24  
25 commonly used prior to this study for several years in both institutions and there was no  
26  
27  
28  
29  
30  
31 specific off-the-job training for these VLs. Channeled disposable blades were used with the  
32  
33  
34  
35 10 King system. The laryngoscopes, drugs, or operators for the TI procedures were chosen by  
36  
37 the attending physician(s) without protocol. Using a hand-held or fixed camera, the  
38  
39  
40  
41 procedures were systematically video-recorded for archival and quality control.  
42  
43  
44  
45  
46  
47

### 48 **Study participants**

49  
50  
51 15 We included consecutive video-recorded cases of emergency TI performed in the ED and  
52  
53  
54 ICU of both institutions between December 2013 and June 2015.  
55  
56  
57  
58  
59  
60

## Data collection and measurements

We recorded the patient demographic and clinical characteristics; location of the TI (ED or ICU); indications for TI (cardiopulmonary arrest, airway obstruction, respiratory failure, hemodynamic instability, or altered mental status); drugs used for TI (sedatives, analgesics, and muscle relaxants); pre-procedurally defined complicating airway characteristics including obesity (body mass index  $\geq 28$  kg/m<sup>2</sup>), limited mouth opening (inter-incisor distance  $< 4$  cm), restricted neck mobilization, short neck (thyromental distance  $< 6$  cm), facial trauma (diagnosed clinically and by imaging), edema of the glottis visualized by the operator, and the presence of blood, secretions, or vomitus in the airways requiring suction or interfering with the procedure. The laryngoscopes used, the length of clinical experience, and the specialty of the operators were recorded. The subjective difficulty, using a visual analogue scale between 0 (easy) and 100 (difficult) was scored by the operators. The first-pass intubation success rate, the number of attempts until successful TI, changes of laryngoscopes and operators, time between laryngoscope insertion into the mouth and the onset of ventilation after TI, complications (edema or spasm of the glottis, dental injuries, regurgitation, and airway hemorrhages), esophageal intubations, and the laryngoscope in use when the complication or the esophageal intubation occurred, were recorded. The data were

1  
2  
3  
4 collected from the video recording for measurements of variables, in addition to medical  
5  
6  
7 records and a questionnaire. Data collection and analysis were performed by a single author  
8  
9  
10  
11 (KS).  
12  
13  
14  
15  
16

## 17 5 Study endpoints

18  
19  
20 The primary study endpoint was the first-pass intubation success rate, while the secondary  
21  
22  
23 endpoints were the time needed to perform the procedure, the subjective difficulty score,  
24  
25  
26 procedural complications, and esophageal intubation.  
27  
28  
29  
30  
31  
32  
33

## 34 10 Sample size and statistical analysis

35  
36  
37 The estimated sample size was based on our own unpublished TI study performed by  
38  
39  
40 residents in patients undergoing elective surgery, in which the first-pass intubation success  
41  
42  
43 rates using the Macintosh and Pentax instruments were 64% and 90%, respectively.  
44  
45  
46

47 Assuming a 20% difference in first-pass intubation success rates between the two

48  
49  
50  
51 15 laryngoscopes, we calculated a sample size of 62 procedures in each group at the 5%  $\alpha$  level  
52  
53  
54 and a power ( $1-\beta$ ) of 80%. Including missing data, we set the sample sizes of each group at  
55  
56  
57 70 and a total of 280 procedures.  
58  
59  
60

1  
2  
3  
4 Categorical variables are expressed as counts and percentages and continuous variables  
5  
6  
7  
8 as means  $\pm$  standard deviations. We compared the outcomes among the four laryngoscopes by  
9  
10  
11 Fisher's exact or Kruskal-Wallis tests. Procedures without an accurate measurement of the  
12  
13  
14 time needed to perform the TI from the video recording as well as those without subjective  
15  
16  
17 5 difficulty scores were excluded from the analysis. A *post hoc* analysis was performed by  
18  
19  
20 comparing all laryngoscopes pairwise to each other using Tukey's test. We also examined  
21  
22  
23 whether the first-pass intubation success rates differed among the four laryngoscopes, in each  
24  
25  
26 prespecified subgroup, according to the duration of clinical experience (1<sup>st</sup> and 2<sup>nd</sup> post-  
27  
28 graduate years as non-expert operators and  $\geq 3^{\text{rd}}$  post-graduate year as experts). A logistic  
29  
30  
31 regression analysis was performed to identify factors influencing the first-pass intubation  
32  
33  
34 10 success rate. We included possible confounding factors that differed significantly among the  
35  
36  
37 four laryngoscopes (indication for TI and restricted neck mobility) and which were identified  
38  
39  
40 in previous studies (limited mouth aperture,[15] blood, secretion or vomitus in the airways,[16]  
41  
42  
43 experts versus non-expert operator[17]). P-values  $<0.05$  were considered statistically  
44  
45  
46  
47  
48  
49  
50  
51 15 significant. The analyses were performed using IBM SPSS Statistics for Mac, version 23.0  
52  
53  
54 (IBM Corporation, Armonk, NY).

57 **Patient and Public Involvement statement:** Patients were not involved.  
58  
59  
60



## Results

### Characteristics of the study population

The patient characteristics are summarized in Table 1. A total of 287 patients underwent video-recorded emergency TI. Among the indications for TI, hemodynamic instability differed significantly among the four laryngoscopes, with the McGrath most frequently used in the presence of hemodynamic instability. Complicating airway characteristics were present in 56% of cases, including blood, secretions, or vomitus in the airways in 123 procedures (43%). The Pentax was often used during procedures complicated by restricted neck mobility. Among the 67 non-experts, 57 operators (89.1%) had received some anesthesiology training in the operating room. They performed  $33 \pm 14$  TIs, including  $6 \pm 5$  procedures using Pentax or McGrath VLs. TI was interrupted in three cases (1%), of which one was managed without TI; another underwent emergency cricothyroidotomy and a third suffered fatal cardiopulmonary arrest. In the remaining 284 procedures, TI was attempted once in 199 (69%), twice in 49 (17%), and >twice in 36 instances (13%). The number of attempts until successful TI were  $1.3 \pm 0.9$  with Pentax,  $1.4 \pm 0.7$  with King,  $1.3 \pm 0.6$  with McGrath, and  $1.5 \pm 0.7$  with Macintosh ( $P=0.007$ ). The laryngoscope was replaced in 22 cases (8%). Out of 59 procedures, the King was replaced by another laryngoscope in nine instances (15%;

1  
2  
3  
4 P=0.043 vs. other groups). The King was replaced by another device in seven procedures  
5  
6  
7 because of separation of the laryngoscope from its disposable blade. The operator was  
8  
9  
10 replaced in 21 attempts at TI (7%), of which 19 were initially made by a non-expert  
11  
12  
13 operator. The number of operators were similarly replaced in the four study groups.  
14  
15  
16  
17  
18  
19  
20  
21  
22  
23

5

### 21 **Main results**

24 The overall first-pass intubation success rate was 69% and differed significantly (P=0.004)  
25  
26 among the four laryngoscopes (table 2). In *post hoc* analysis, the first-pass intubation success  
27  
28 rates were higher for the Pentax and McGrath than those with the King or Macintosh  
29  
30 laryngoscopes, respectively, although there were no significant differences in the expert  
31  
32 operators' subgroup (Table 2). Overall, non-experts and experts showed similar first-pass  
33  
34 10 intubation success rates of 67% and 73%, respectively. Logistic regression analysis with  
35  
36 adjustments for the indication for TI, restricted neck mobilization, limited mouth opening,  
37  
38 blood/secretion/vomitus in the airway, and experts/non-expert revealed that the odds ratios  
39  
40  
41  
42  
43  
44  
45  
46  
47  
48  
49  
50  
51 15 for first-pass intubation success were significantly higher for the Pentax and McGrath  
52  
53 laryngoscopes than that for the King laryngoscope when compared to the Macintosh  
54  
55 laryngoscope (Table 3).  
56  
57  
58  
59  
60

1  
2  
3  
4 There were significant differences in the times needed to perform TI among the  
5  
6  
7  
8 four laryngoscopes, although no differences were observed in pairwise comparisons of the  
9  
10  
11 laryngoscopes in the *post hoc* analysis (Table 4). There was a significant difference in the  
12  
13  
14 difficulty scores among the four laryngoscopes, with the McGrath significantly easier to use  
15  
16  
17  
18 5 than the Macintosh in *post hoc* analysis (Table 4).  
19  
20

21 TI complications occurred in 21 procedures (7%), consisting of one dental  
22  
23  
24 trauma, seven spasms or edemas of the glottis, five instances of regurgitation, and 10  
25  
26  
27 hemorrhages, although there were no significant differences among the four laryngoscopes.  
28  
29  
30 The esophagus was intubated in three instances (1.2%) by non-experts using the Macintosh.  
31  
32  
33  
34 10  
35  
36  
37  
38  
39  
40  
41  
42  
43  
44  
45  
46  
47  
48  
49  
50  
51  
52  
53  
54  
55  
56  
57  
58  
59  
60

## Discussion

In this retrospective, observational, two-center study, the first-pass intubation success rates for emergency TI were significantly higher for Pentax or McGrath laryngoscopes than for King or Macintosh laryngoscopes when performed by non-expert operators. After adjusting for confounding factors, the odds ratios for first-pass intubation success were significantly higher for the Pentax and McGrath laryngoscopes than that for the King laryngoscope, when compared to the Macintosh laryngoscope. The use of the McGrath was associated with a lower subjective difficulty of performing TI than that for the use of the Macintosh.

A previous study of VLs for TI by experienced anesthetists in the operating room revealed a better visualization of the glottis with the Pentax than that with the Macintosh, while the success rates and TI procedure times were similar [8]. Moreover, studies with inexperienced residents reported a 96% first-pass intubation success rate with the Pentax versus 70% with the Macintosh and 44 and 71 sec, respectively, to secure the airways [9].

Our results are concordant with these success rates, suggesting the advantageous characteristics of the Pentax, particularly for novice operators. The suitable shape of the PBLADE<sup>®</sup>, which indirectly visualizes the glottis regardless of the head and neck position, the existence of a blade channel to set the tracheal tube, and the guiding function of the target

1  
2  
3  
4 mark on the screen support the preferential use of the Pentax among the VLs [18].  
5  
6

7           The McGrath is a relatively compact device without a tracheal tube guide channel  
8  
9  
10 [19]. Like the Macintosh, it offers an indirect view of the glottis by flexible manipulations of  
11  
12  
13  
14 the laryngoscope and tracheal tube. Several factors, therefore, such as a restricted neck  
15  
16  
17  
18 5 mobility or the operator's experience with TI, might influence the success rate of the Pentax  
19  
20  
21 versus the McGrath. However, the first-pass intubation success rates were nearly the same  
22  
23  
24 between these VLs in this study population. A randomized study comparing the performance  
25  
26  
27 of Pentax versus McGrath in emergency TI is, therefore, warranted.  
28  
29

30           The use of a stylet facilitates the manipulation of the tracheal tube adjacent to the  
31  
32  
33  
34 10 glottis. However, a randomized clinical trial in the ICU population, which showed no  
35  
36  
37  
38 improvement in a McGrath-used first-pass intubation, did not use a stylet, which was used in  
39  
40  
41 all McGrath cases here [20]. This may be the reason for the nonconformance between the  
42  
43  
44 studies' results.  
45  
46

47           To our knowledge, the present study was the first to compare the Pentax and King  
48  
49  
50  
51 15 in clinical settings. Although they have similar shapes and tracheal tube guiding  
52  
53  
54 characteristics, the first-pass intubation success rate was significantly lower for the King than  
55  
56  
57 that for the Pentax. The orientation of the King tracheal tube is relatively downward  
58  
59  
60

1  
2  
3  
4 compared to that of the Pentax, which may interfere with its advancement. In addition, the  
5  
6  
7 King has no marking to help in the placement of the tube. System malfunction, which  
8  
9  
10 occurred in seven patients in this study, may also have lowered the success rate of the King.  
11  
12  
13

14 Several factors, which varied among the four laryngoscopes, had repercussions on the  
15  
16  
17 5 success rate of TI. Blood or vomitus in the airways, an important complication when  
18  
19 performing emergency TI, may lower the image quality. Blood, secretions, or vomitus were  
20  
21 present in the airways in 43% of procedures, significantly lowering the first-pass intubation  
22  
23  
24 success rate [16]. However, after adjusting for this factor, multiple variable analysis  
25  
26  
27 confirmed the advantage of the Pentax and McGrath. A limited mouth aperture was also  
28  
29  
30  
31 10 correlated with the difficulty of TI [15]. This, however, was problematic in only 6% of cases  
32  
33  
34  
35  
36  
37 and did not represent a major obstacle to the insertion of the devices.  
38  
39  
40

41 The results of the present study suggest the usefulness of the Pentax or McGrath VLs  
42  
43  
44 for emergency TI performed by novice physicians. However, the generalizability of the  
45  
46  
47 results for intubation in other settings (in the operating theater or prehospital settings, or by  
48  
49  
50  
51 15 non-physicians) remains uncertain.  
52  
53

54 Systematic review and meta-analysis of randomized controlled trials revealed that  
55  
56  
57 video laryngoscopy does not improve first-attempt intubation success rates compared to that  
58  
59  
60

1  
2  
3  
4 of direct laryngoscopy in emergency, critical and surgical patients [21, 22]. However,  
5  
6  
7  
8 multiple models of VLs with various characteristics were combined as a “VL group” in the  
9  
10  
11 analysis. Here, we intended to compare the individual performances of VLs.  
12  
13  
14  
15  
16

## 5 **Study limitations**

17  
18  
19  
20  
21 This was an observational study, in which confounding factors may have influenced the  
22  
23  
24 success rate of TI and biased the results. However, after adjusting for possible confounding  
25  
26  
27 factors based on those reported in previous studies, we observed a significant relationship  
28  
29  
30 between VLs and first-pass intubation success rates. We included video-recorded cases of TI  
31  
32  
33  
34 10 during the study period. Unfortunately, only 22% of cases were recorded due to the limited  
35  
36  
37 availability of physicians who were able to operate the video cameras. Thus, there might be a  
38  
39  
40 selection bias. The data collection and analysis were performed by a single author (KS),  
41  
42  
43  
44 leaving the potential for observer bias. Furthermore, we classified the "non-experts" based on  
45  
46  
47 their clinical experience. A precise index to grade the level of intubation skill might have  
48  
49  
50  
51 15 been preferable, although it does not currently exist. Finally, bias based on operator  
52  
53  
54 familiarity with each laryngoscope cannot be excluded. However, given the scarce overall  
55  
56  
57  
58  
59  
60

1  
2  
3  
4 experience of TI itself prior to this study (4.6 times/person), the results of the non-expert  
5  
6  
7 group are likely to be less biased.  
8  
9  
10  
11  
12  
13  
14  
15  
16  
17  
18  
19  
20  
21  
22  
23  
24  
25  
26  
27  
28  
29  
30  
31  
32  
33  
34  
35  
36  
37  
38  
39  
40  
41  
42  
43  
44  
45  
46  
47  
48  
49  
50  
51  
52  
53  
54  
55  
56  
57  
58  
59  
60

For peer review only



## Conclusion

When performing emergency TI in the ED or the ICU, the use of the Pentax and McGrath laryngoscopes were associated with significantly higher first-pass intubation success rates than that of the King laryngoscope when compared to the Macintosh laryngoscope, especially when operated by non-experts.

## List of Abbreviations

|           |                        |
|-----------|------------------------|
| TI        | tracheal intubation    |
| VL        | video laryngoscope     |
| Pentax    | Pentax-Airway Scope™   |
| 5 King    | King Vision®           |
| McGrath   | McGrath® MAC           |
| Macintosh | Macintosh laryngoscope |
| ICU       | intensive care unit    |
| ED        | emergency department   |

10

## Declarations

**Acknowledgements:** We thank the attending physicians and residents of the Department of Emergency and Critical Care Medicine of Hiroshima University and the Critical Care Medical Center of Hiroshima Prefectural Hospital who contributed to the data collection.

**Contributions:** Suzuki conceived the study, designed the trial, and collected and managed the data. Kusunoki, Tanigawa, and Shime supervised the conduct of the trial and data collection. Suzuki drafted the manuscript, and all authors contributed substantially to its revision. Suzuki takes responsibility for the paper as a whole.

**Funding:** This work was supported by KAKENHI Grants from the Japan Society for the Promotion of Science (JSPS) (Numbers JP 17K11573).

**Competing interests:** The authors declare that they have no competing interests.

1  
2  
3  
4 **Ethics approval and consent to participate:** This study was reviewed and approved by the  
5  
6  
7 research ethics committees of Hiroshima University (No.1069) and Hiroshima Prefectural  
8  
9  
10 Hospital (No.2013-76).  
11  
12  
13  
14  
15  
16

17  
18 5 **Trial registration number:** University Hospital Medical Information Network  
19  
20 Clinical Trials Registry (UMIN000027925, <https://upload.umin.ac.jp/cgi-open->  
21  
22 [bin/ctr\\_e/ctr\\_view.cgi?recptno=R000016182](https://upload.umin.ac.jp/cgi-open-bin/ctr_e/ctr_view.cgi?recptno=R000016182)); date of registration 26.06.2017  
23  
24  
25 (retrospectively registered)  
26  
27  
28  
29  
30  
31  
32  
33

34 10 **Consent for publication:** Not applicable.  
35  
36  
37  
38  
39  
40

41 **Data sharing statement:** The data included deidentified participant data. The data are  
42  
43  
44 available from author (KS, e-mail: [suzukik@hiroshima-u.ac.jp](mailto:suzukik@hiroshima-u.ac.jp)).  
45  
46  
47  
48  
49  
50  
51  
52  
53  
54  
55  
56  
57  
58  
59  
60

## References

1. Martin LD, Mhyre JM, Shanks AM, *et al.* 3,423 emergency tracheal intubations at a university hospital: airway outcomes and complications. *Anesthesiology* 2011;114:42-48.
2. Schmidt UH, Kumwilaisak K, Bittner E, *et al.* Effects of supervision by attending anesthesiologists on complications of emergency tracheal intubation. *Anesthesiology* 2008;109:973-977.
3. Benedetto WJ, Hess DR, Gettings E, *et al.* Urgent tracheal intubation in general hospital units: an observational study. *J Clin Anesth.* 2007;19:20-24.
4. Schwartz DE, Matthay MA, Cohen NH. Death and other complications of emergency airway management in critically ill adults. A prospective investigation of 297 tracheal intubations. *Anesthesiology* 1995;82:367-376.
5. Simpson GD, Ross MJ, McKeown DW, *et al.* Tracheal intubation in the critically ill: a multi-centre national study of practice and complications. *Br J Anaesth.* 2012;108:792-799.
6. Liu L, Tanigawa K, Kusunoki S, *et al.* Tracheal intubation of a difficult airway using Airway Scope, Airtraq, and Macintosh laryngoscope: a comparative manikin study of

- 1  
2  
3  
4 inexperienced personnel. *Anesth Analg*. 2010;110:1049-1055.  
5  
6  
7  
8 7. Carlson JN, Brown CA. Does the use of video laryngoscopy improve intubation  
9  
10 outcomes? *Ann Emerg Med*. 2014;64:165-166.  
11  
12  
13  
14 8. Teoh WH, Saxena S, Shah MK, *et al*. Comparison of three videolaryngoscopes:  
15  
16  
17 5 Pentax Airway Scope, C-MAC, Glidescope vs the MacIntosh laryngoscope for  
18  
19 tracheal intubation. *Anaesthesia* 2010;65:1126-1132.  
20  
21  
22  
23  
24 9. Hirabayashi Y, Seo N. Tracheal intubation by non-anaesthetist physicians using the  
25  
26  
27 Airway Scope. *Emerg Med J*. 2007;24:572-573.  
28  
29  
30  
31 10. Taylor AM, Peck M, Launcelott S, *et al*. The McGrath® Series 5 videolaryngoscope  
32  
33  
34 10 vs the Macintosh laryngoscope: a randomised, controlled trial in patients with a  
35  
36  
37 simulated difficult airway. *Anaesthesia* 2013;68:142-147.  
38  
39  
40  
41 11. Janz DR, Semler MW, Lentz RJ, *et al*. Randomized Trial of Video Laryngoscopy for  
42  
43  
44 Endotracheal Intubation of Critically Ill Adults. *Crit Care Med*. 2016;44:1980-1987.  
45  
46  
47  
48 12. Rombey T, Schieren M, Pieper D. Video versus direct laryngoscopy for inpatient  
49  
50  
51 15 emergency intubation in adults: a systematic review and meta-analysis of randomized  
52  
53  
54 controlled trials. *Dtsch Arztebl Int*. 2018;115:437-444.  
55  
56  
57  
58 13. Hasegawa K, Shigemitsu K, Hagiwara Y, *et al*. Association between repeated  
59  
60

1  
2  
3  
4 intubation attempts and adverse events in emergency departments: An analysis of a  
5  
6  
7 multicenter prospective observational study. *Ann Emerg Med.* 2012;60:749-754.e2.  
8  
9

10  
11 14. Sakles JC, Chiu S, Mosier J, *et al.* The importance of first pass success when  
12  
13  
14 performing orotracheal intubation in the emergency department. *Acad Emerg Med.*  
15  
16  
17 2013;20:71-78.  
18 5

19  
20  
21 15. Breckwoldt J, Klemstein S, Brunne B, *et al.* Difficult prehospital endotracheal  
22  
23  
24 intubation - predisposing factors in a physician based EMS. *Resuscitation*  
25  
26  
27 2011;82:1519-1524.  
28

29  
30  
31 16. Gaither JB, Spaite DW, Stolz U, *et al.* Prevalence of difficult airway predictors in  
32  
33  
34 10 cases of failed prehospital endotracheal intubation. *J Emerg Med* 2014;47(3):294-300.  
35

36  
37  
38 17. Crewdson K, Lockey DJ, Røislien J, *et al.* The success of pre-hospital tracheal  
39  
40  
41 intubation by different pre-hospital providers: a systematic literature review and meta-  
42  
43  
44 analysis. *Crit Care* 2017;21:31.  
45

46  
47  
48 18. Koyama J, Aoyama T, Kusano Y, *et al.* Description and first clinical application of  
49  
50  
51 15 AirWay Scope for tracheal intubation. *J Neurosurg Anesth.* 2006;18:247-250.  
52

53  
54  
55 19. Kotera A, Irie H, Iwashita S, *et al.* Comparison of the McGrath MAC video  
56  
57  
58 laryngoscope and the Pentax Airwayscope during chest compression: a manikin  
59  
60

1  
2  
3  
4 study. *J Intensive Care* 2014;2:18.  
5  
6

7  
8 20. Lascarrou JB, Boisrame-Helms J, Bailly A, *et al.* Video laryngoscopy vs direct  
9  
10 laryngoscopy on successful first-pass orotracheal intubation among ICU patients: a  
11  
12 randomized clinical trial. *JAMA*. 2017;317(5):483-493.  
13  
14  
15

16  
17 5 21. Jiang J, Ma D, Li B, *et al.* Video laryngoscopy does not improve the intubation  
18  
19 outcomes in emergency and critical patients - a systematic review and meta-analysis  
20  
21 of randomized controlled trials. *Crit Care*. 2017;21(1):288  
22  
23  
24  
25

26  
27 22. Lewis SR, Butler AR, Parker J, *et al.* Video laryngoscopy versus direct laryngoscopy  
28  
29 for adult patients requiring tracheal intubation. *Cochrane Database Syst Rev*.  
30  
31  
32  
33  
34 10 2016;11:CD011136  
35  
36  
37  
38  
39  
40  
41  
42  
43  
44  
45  
46  
47  
48  
49  
50  
51  
52  
53  
54  
55  
56  
57  
58  
59  
60



**Table 1. Baseline and difficult airway characteristics**

|                                                     | All<br>(n=287)        | Pentax-Airway Scope<br>(n=82) | King VISION<br>(n=59) | McGrath Mac<br>(n=82) | Macintosh<br>(n=64) | P     |
|-----------------------------------------------------|-----------------------|-------------------------------|-----------------------|-----------------------|---------------------|-------|
| Men                                                 | 165 (57.5)            | 54 (65.9)                     | 31 (52.5)             | 51 (62.2)             | 29 (45.3)           | 0.057 |
| Age, years                                          | 65.4±20.5             | 60.7±24.8                     | 69.0±16.2             | 67.4±17.1             | 65.7±21.4           | 0.457 |
| Height, cm                                          | 158.1±14.4            | 156.9±19.3                    | 159.3±9.0             | 160.9±10.2            | 154.9±14.9          | 0.044 |
| Weight, kg                                          | 55.9±13.9             | 56.3±16.9                     | 56.2±10.2             | 56.7±11.9             | 54.0±15.2           | 0.400 |
| Body mass index                                     | 22.0±3.7              | 22.3±3.8                      | 22.1±3.6              | 21.7±3.2              | 22.1±4.2            | 0.794 |
| Expert operators                                    | 131 (45.6)            | 36 (43.9)                     | 27 (45.8)             | 45 (54.9)             | 23 (35.9)           | 0.149 |
| Location of tracheal intubation (ED/ICU)            | 162 (56.4)/125 (43.6) | 49 (59.8)/33 (40.2)           | 37 (62.7)/22 (37.3)   | 37 (45.1)/45 (54.9)   | 39 (60.9)/25 (39.1) | 0.111 |
| Indications for tracheal intubation                 |                       |                               |                       |                       |                     |       |
| Cardiopulmonary arrest                              | 114 (39.7)            | 34 (41.5)                     | 26 (44.1)             | 25 (30.5)             | 29 (45.3)           | 0.220 |
| Airway obstruction                                  | 14 (4.9)              | 4 (4.9)                       | 1 (1.7)               | 7 (8.5)               | 2 (3.1)             | 0.305 |
| Respiratory failure                                 | 45 (15.7)             | 12 (14.6)                     | 11 (18.6)             | 14 (17.1)             | 8 (12.5)            | 0.789 |
| Hemodynamic instability                             | 32 (11.1)             | 6 (7.3)                       | 2 (3.4)               | 20 (24.4)             | 4 (6.3)             | 0.000 |
| Altered mental status                               | 82 (28.6)             | 26 (31.7)                     | 19 (32.2)             | 16 (19.5)             | 21 (32.8)           | 0.182 |
| Drugs used for tracheal intubation                  |                       |                               |                       |                       |                     |       |
| None                                                | 148 (51.6)            | 44 (53.7)                     | 32 (54.2)             | 35 (42.7)             | 37 (57.8)           | 0.274 |
| Sedatives                                           | 116 (40.4)            | 33 (40.2)                     | 24 (40.7)             | 35 (42.7)             | 24 (37.5)           | 0.944 |
| Analgesics                                          | 91 (31.7)             | 22 (26.8)                     | 15 (25.4)             | 36 (43.9)             | 18 (28.1)           | 0.053 |
| Muscle relaxants                                    | 59 (20.6)             | 15 (18.3)                     | 10 (16.9)             | 22 (26.8)             | 12 (18.8)           | 0.450 |
| Drugs used for tracheal intubation in Non-CPA cases |                       |                               |                       |                       |                     |       |
| None                                                | 34 (19.7)             | 10 (20.8)                     | 6 (18.2)              | 10 (17.5)             | 8 (22.9)            | 0.925 |
| Sedatives                                           | 116 (67.1)            | 33 (68.8)                     | 24 (72.7)             | 35 (61.4)             | 24 (68.6)           | 0.722 |
| Analgesics                                          | 91 (52.6)             | 22 (45.8)                     | 15 (45.5)             | 36 (63.2)             | 18 (51.4)           | 0.250 |
| Muscle relaxants                                    | 59 (34.1)             | 15 (31.3)                     | 10 (30.3)             | 22 (38.6)             | 12 (34.3)           | 0.842 |
| Difficult airway characteristics                    |                       |                               |                       |                       |                     |       |
| Obesity                                             | 16 (5.6)              | 6 (7.3)                       | 3 (5.1)               | 3 (3.7)               | 4 (6.3)             | 0.793 |
| Limited mouth opening                               | 17 (5.9)              | 5 (6.1)                       | 5 (8.5)               | 6 (7.3)               | 1 (1.6)             | 0.319 |
| Restricted neck mobilization                        | 39 (13.6)             | 19 (23.2)                     | 6 (10.2)              | 7 (8.5)               | 7 (10.9)            | 0.040 |
| Short neck                                          | 9 (3.1)               | 3 (3.7)                       | 1 (1.7)               | 3 (3.7)               | 2 (3.1)             | 0.937 |
| Facial trauma                                       | 13 (4.5)              | 7 (8.5)                       | 1 (1.7)               | 4 (4.9)               | 1 (1.6)             | 0.171 |
| Edema of glottis                                    | 7 (2.4)               | 2 (2.4)                       | 0 (0.0)               | 4 (4.9)               | 1 (1.6)             | 0.390 |
| Bloods, secretion, or vomitus in airway             | 123 (42.9)            | 36 (43.9)                     | 23 (39.0)             | 38 (46.3)             | 26 (40.6)           | 0.821 |
| Cases with difficult airway characteristics         | 161 (56.1)            | 47 (57.3)                     | 31 (52.5)             | 48 (58.5)             | 35 (54.7)           | 0.897 |

Values are numbers (%) of observations or means  $\pm$  standard deviations. ED, emergency department; ICU, intensive care unit; CPA, cardiopulmonary arrest.

For peer review only

1  
2  
3  
4  
5  
6  
7  
8  
9  
10  
11  
12  
13  
14  
15  
16  
17  
18  
19  
20  
21  
22  
23  
24  
25  
26  
27  
28  
29  
30  
31  
32  
33  
34  
35  
36  
37  
38  
39  
40  
41  
42  
43  
44  
45  
46

**Table 2. First-pass intubation success rates of four laryngoscopes**

|                                      | All laryngoscopes | Pentax-Airway Scope | King VISION | McGrath Mac | Macintosh | P       |
|--------------------------------------|-------------------|---------------------|-------------|-------------|-----------|---------|
| All operators, n                     | 287               | 82                  | 59          | 82          | 64        |         |
| <b>First-pass intubation success</b> | 199 (69)          | 64 (78)*            | 34 (58)     | 64 (78)†    | 37 (58)   | 0.004   |
| Non-expert operators                 | 156               | 46                  | 32          | 37          | 41        |         |
| <b>First-pass intubation success</b> | 104 (67)          | 40 (87)‡            | 16 (50)     | 29 (78)§    | 19 (46)   | 0.00004 |
| Expert operators                     | 131               | 36                  | 27          | 45          | 23        |         |
| <b>First-pass intubation success</b> | 95 ( 73 )         | 24 (67)             | 18 (67)     | 35 (78)     | 18 (78)   | 0.556   |

Values are numbers (%) of observations; *post hoc* analyses were performed using Tukey's test for paired comparisons of four laryngoscopes .

\*:vs. King VISION P=0.043, \*:vs. Macintosh P=0.039, †:vs. King VISION P=0.043, †:vs. Macintosh P=0.039

‡:vs. King VISION P=0.002, ‡:vs. Macintosh P<0.001, §:vs. King VISION P=0.043, §:vs. Macintosh P=0.009

**Table 3. Multiple variable analysis of factors influencing the first-pass intubation success rates**

| Factors                                   | Odd ratios    | 95% confidence intervals | P     |
|-------------------------------------------|---------------|--------------------------|-------|
| Laryngoscopes                             |               |                          |       |
| Macintosh (reference)                     | 1             | -                        | -     |
| Pentax-Airway Scope                       | 3.422         | 1.551-7.550              | 0.002 |
| King VISION                               | 1.056         | 0.487-2.289              | 0.889 |
| McGrath Mac                               | 3.758         | 1.640-8.612              | 0.002 |
| Indications for tracheal intubation       |               |                          |       |
| Cardiopulmonary arrest                    | 1 (reference) |                          |       |
| Airway obstruction                        | 0.226         | 0.063-0.812              | 0.023 |
| Respiratory failure                       | 0.720         | 0.284-1.822              | 0.488 |
| Hemodynamic instability                   | 0.380         | 0.137-1.054              | 0.063 |
| Altered mental status                     | 0.361         | 0.180-0.723              | 0.004 |
| Difficult airway characteristics          |               |                          |       |
| Mouth opening                             |               |                          |       |
| Unlimited                                 | 1 (reference) | -                        | -     |
| Limited                                   | 0.092         | 0.026-0.323              | 0.000 |
| Neck mobility                             |               |                          |       |
| Unrestricted                              | 1 (reference) | -                        | -     |
| Restricted                                | 0.951         | 0.414-2.182              | 0.905 |
| Blood, secretions, vomitus in the airways |               |                          |       |
| Absent                                    | 1 (reference) | -                        | -     |
| Present                                   | 0.455         | 0.257-0.804              | 0.007 |
| Operators                                 |               |                          |       |
| Non-expert                                | 1 (reference) | -                        | -     |
| Expert                                    | 1.688         | 0.916-3.108              | 0.093 |

1  
2  
3  
4  
5  
6  
7  
8  
9  
10  
11  
12  
13  
14  
15  
16  
17  
18  
19  
20  
21  
22  
23  
24  
25  
26  
27  
28  
29  
30  
31  
32  
33  
34  
35  
36  
37  
38  
39  
40  
41  
42  
43  
44  
45  
46

For peer review only

**Table 4. Comparisons of times needed to perform tracheal intubations and of difficulty scores for four different laryngoscopes**

|                                  | Overall       | Pentax-Airway Scope | King VISION  | McGrath Mac   | Macintosh    | P     |
|----------------------------------|---------------|---------------------|--------------|---------------|--------------|-------|
| Time to perform intubations, sec | 60±31 (n=269) | 63±34 (n=78)        | 63±31 (n=45) | 62±31 (n=79)  | 52±27 (n=67) | 0.043 |
| Difficulty score <sup>†</sup>    | 39±27 (n=258) | 39±26 (n=72)        | 43±26 (n=45) | 32±27* (n=78) | 45±26 (n=63) | 0.009 |

Values are means ± standard deviations; \*P=0.027 vs. Macintosh.

<sup>†</sup>Difficulty was scored by visual analogue scale, from very easy (0) to very difficult (100).

*post hoc* analyses were performed using Tukey's test for paired comparisons of 4 laryngoscopes.

For peer review only

STROBE Statement—Checklist of items that should be included in reports of *cohort studies*

|                           | Item No | Recommendation                                                                                                                                                                                    | Reported on page No |
|---------------------------|---------|---------------------------------------------------------------------------------------------------------------------------------------------------------------------------------------------------|---------------------|
| <b>Title and abstract</b> | 1       | (a) Indicate the study's design with a commonly used term in the title or the abstract                                                                                                            | 1, 2                |
|                           |         | (b) Provide in the abstract an informative and balanced summary of what was done and what was found                                                                                               | 2-3                 |
| <b>Introduction</b>       |         |                                                                                                                                                                                                   |                     |
| Background/rationale      | 2       | Explain the scientific background and rationale for the investigation being reported                                                                                                              | 4-5                 |
| Objectives                | 3       | State specific objectives, including any prespecified hypotheses                                                                                                                                  | 4-5                 |
| <b>Methods</b>            |         |                                                                                                                                                                                                   |                     |
| Study design              | 4       | Present key elements of study design early in the paper                                                                                                                                           | 6-8                 |
| Setting                   | 5       | Describe the setting, locations, and relevant dates, including periods of recruitment, exposure, follow-up, and data collection                                                                   | 6                   |
| Participants              | 6       | (a) Give the eligibility criteria, and the sources and methods of selection of participants. Describe methods of follow-up                                                                        | 7                   |
|                           |         | (b) For matched studies, give matching criteria and number of exposed and unexposed                                                                                                               |                     |
| Variables                 | 7       | Clearly define all outcomes, exposures, predictors, potential confounders, and effect modifiers. Give diagnostic criteria, if applicable                                                          | 7-8                 |
| Data sources/measurement  | 8*      | For each variable of interest, give sources of data and details of methods of assessment (measurement). Describe comparability of assessment methods if there is more than one group              | 7-8                 |
| Bias                      | 9       | Describe any efforts to address potential sources of bias                                                                                                                                         | 8                   |
| Study size                | 10      | Explain how the study size was arrived at                                                                                                                                                         | 9                   |
| Quantitative variables    | 11      | Explain how quantitative variables were handled in the analyses. If applicable, describe which groupings were chosen and why                                                                      | 7-8                 |
| Statistical methods       | 12      | (a) Describe all statistical methods, including those used to control for confounding                                                                                                             | 9-10                |
|                           |         | (b) Describe any methods used to examine subgroups and interactions                                                                                                                               | 9                   |
|                           |         | (c) Explain how missing data were addressed                                                                                                                                                       | 9                   |
|                           |         | (d) If applicable, explain how loss to follow-up was addressed                                                                                                                                    |                     |
|                           |         | (e) Describe any sensitivity analyses                                                                                                                                                             |                     |
| <b>Results</b>            |         |                                                                                                                                                                                                   |                     |
| Participants              | 13*     | (a) Report numbers of individuals at each stage of study—eg numbers potentially eligible, examined for eligibility, confirmed eligible, included in the study, completing follow-up, and analysed | 11                  |
|                           |         | (b) Give reasons for non-participation at each stage                                                                                                                                              |                     |
|                           |         | (c) Consider use of a flow diagram                                                                                                                                                                |                     |
| Descriptive data          | 14*     | (a) Give characteristics of study participants (eg demographic, clinical, social) and information on exposures and potential confounders                                                          | 25                  |
|                           |         | (b) Indicate number of participants with missing data for each                                                                                                                                    | 11                  |

|                          |     | variable of interest                                                                                                                                                                                         |           |
|--------------------------|-----|--------------------------------------------------------------------------------------------------------------------------------------------------------------------------------------------------------------|-----------|
|                          |     | (c) Summarise follow-up time (eg, average and total amount)                                                                                                                                                  |           |
| Outcome data             | 15* | Report numbers of outcome events or summary measures over time                                                                                                                                               | 12-13, 26 |
| Main results             | 16  | (a) Give unadjusted estimates and, if applicable, confounder-adjusted estimates and their precision (eg, 95% confidence interval). Make clear which confounders were adjusted for and why they were included | 26, 27    |
|                          |     | (b) Report category boundaries when continuous variables were categorized                                                                                                                                    |           |
|                          |     | (c) If relevant, consider translating estimates of relative risk into absolute risk for a meaningful time period                                                                                             |           |
| Other analyses           | 17  | Report other analyses done—eg analyses of subgroups and interactions, and sensitivity analyses                                                                                                               | 12, 26    |
| <b>Discussion</b>        |     |                                                                                                                                                                                                              |           |
| Key results              | 18  | Summarise key results with reference to study objectives                                                                                                                                                     | 14        |
| Limitations              | 19  | Discuss limitations of the study, taking into account sources of potential bias or imprecision. Discuss both direction and magnitude of any potential bias                                                   | 16        |
| Interpretation           | 20  | Give a cautious overall interpretation of results considering objectives, limitations, multiplicity of analyses, results from similar studies, and other relevant evidence                                   | 14        |
| Generalisability         | 21  | Discuss the generalisability (external validity) of the study results                                                                                                                                        | 16        |
| <b>Other information</b> |     |                                                                                                                                                                                                              |           |
| Funding                  | 22  | Give the source of funding and the role of the funders for the present study and, if applicable, for the original study on which the present article is based                                                | 20        |

\*Give information separately for exposed and unexposed groups.

**Note:** An Explanation and Elaboration article discusses each checklist item and gives methodological background and published examples of transparent reporting. The STROBE checklist is best used in conjunction with this article (freely available on the Web sites of PLoS Medicine at <http://www.plosmedicine.org/>, Annals of Internal Medicine at <http://www.annals.org/>, and Epidemiology at <http://www.epidem.com/>). Information on the STROBE Initiative is available at <http://www.strobe-statement.org>.
